# Supplementary material
Source: MDPI journal article supplement (https://www.mdpi.com/2073-4441/16/9/1240)
Supplement: s1 [file s1]

**Table S1.** Mann-Kendall trend test results (+: Increasing trend; -: decreasing trend; NO: no trend).

| Monitoring well | X      | Y       | EC          |         |                            | pH          |         |              | HCO <sub>3</sub> |         |                     |
|-----------------|--------|---------|-------------|---------|----------------------------|-------------|---------|--------------|------------------|---------|---------------------|
|                 |        |         | Test Result | p value | OLS [ $\mu$ S/cm] 21 years | Test Result | p value | OLS 21 years | Test Result      | p value | OLS [mg/L] 21 years |
| 1               | 431770 | 5040251 | -           | 0.000   | -158.00                    | NO          | 0.112   | -0.25        | -                | 0.001   | -54.18              |
| 2               | 427783 | 5046528 | NO          | 0.092   | -12.71                     | NO          | 0.201   | -0.13        | +                | 0.007   | 16.13               |
| 3               | 424191 | 5040229 | NO          | 0.086   | 9.20                       | NO          | 0.297   | 0.13         | +                | 0.001   | 18.04               |
| 4               | 424624 | 5040265 | NO          | 0.138   | -42.12                     | NO          | 0.491   | 0.08         | NO               | 0.472   | 4.10                |
| 5               | 430239 | 5042875 | -           | 0.000   | -107.25                    | NO          | 0.232   | 0.12         | +                | 0.025   | 11.73               |
| 6               | 427392 | 5035374 | NO          | 0.073   | -50.40                     | NO          | 0.211   | -0.17        | NO               | 0.056   | 8.74                |
| 7               | 436746 | 5045849 | -           | 0.000   | -34.10                     | NO          | 0.366   | -0.03        | NO               | 0.085   | -6.02               |
| 8               | 435178 | 5037485 | -           | 0.000   | -194.88                    | +           | 0.006   | 0.20         | +                | 0.012   | 15.96               |
| 9               | 434771 | 5037329 | NO          | 0.491   | 34.80                      | NO          | 0.372   | -0.17        | NO               | 0.330   | 10.69               |
| 10              | 422055 | 5041944 | -           | 0.019   | -11.84                     | -           | 0.007   | -0.51        | NO               | 0.081   | 7.57                |
| 11              | 423534 | 5045485 | NO          | 0.061   | -33.93                     | -           | 0.008   | -0.25        | -                | 0.023   | -39.13              |
| 12              | 433592 | 5032983 | -           | 0.002   | -146.00                    | +           | 0.025   | 0.42         | -                | 0.004   | -29.64              |
| 13              | 427645 | 5040931 | -           | 0.009   | -66.00                     | NO          | 0.461   | -0.13        | +                | 0.015   | 13.94               |
| 14              | 437018 | 5036823 | +           | 0.000   | 53.20                      | NO          | 0.417   | -0.28        | +                | 0.000   | 34.85               |
| 15              | 431471 | 5019404 | -           | 0.005   | -42.24                     | NO          | 0.107   | 0.17         | +                | 0.001   | 44.91               |
| 16              | 430746 | 5016914 | -           | 0.000   | -66.88                     | NO          | 0.059   | -0.17        | NO               | 0.363   | -0.35               |
| 17              | 457650 | 5022591 | -           | 0.005   | -41.60                     | NO          | 0.154   | -0.17        | NO               | 0.220   | 4.79                |
| 18              | 443313 | 5037005 | NO          | 0.199   | 3.20                       | NO          | 0.470   | -0.03        | +                | 0.000   | 29.99               |
| 19              | 438769 | 5028253 | NO          | 0.204   | 10.40                      | NO          | 0.360   | -0.13        | NO               | 0.421   | 2.65                |
| 20              | 422577 | 5017781 | +           | 0.020   | 44.84                      | NO          | 0.214   | -0.08        | +                | 0.002   | 54.30               |
| 21              | 450209 | 5009561 | NO          | 0.092   | -20.80                     | NO          | 0.161   | -0.08        | +                | 0.001   | 24.00               |
| 22              | 428597 | 5004724 | NO          | 0.113   | 22.42                      | NO          | 0.128   | 0.16         | +                | 0.030   | 17.38               |
| 23              | 444778 | 5030455 | NO          | 0.104   | -166.16                    | +           | 0.003   | 0.41         | NO               | 0.245   | -12.63              |
| 24              | 451374 | 5050525 | NO          | 0.058   | -55.36                     | NO          | 0.322   | 0.10         | NO               | 0.095   | 4.28                |
| 25              | 452227 | 5042254 | -           | 0.018   | -29.12                     | NO          | 0.406   | 0.00         | NO               | 0.202   | -4.59               |
| 26              | 430799 | 5013982 | -           | 0.022   | -13.26                     | -           | 0.028   | -0.20        | NO               | 0.318   | -11.52              |
| 27              | 462681 | 5004450 | NO          | 0.305   | 8.99                       | NO          | 0.452   | -0.07        | +                | 0.004   | 22.79               |
| 28              | 440319 | 5003523 | +           | 0.016   | 54.36                      | NO          | 0.294   | -0.04        | +                | 0.023   | 54.87               |
| 29              | 454559 | 5009141 | -           | 0.046   | -46.81                     | NO          | 0.500   | 0.03         | NO               | 0.276   | 9.13                |
| 30              | 459526 | 5011849 | NO          | 0.423   | -18.88                     | NO          | 0.226   | -0.17        | NO               | 0.092   | 14.28               |
| 31              | 460675 | 5012364 | NO          | 0.076   | 12.54                      | +           | 0.004   | 0.24         | NO               | 0.084   | 32.03               |
| 32              | 450255 | 5025245 | NO          | 0.148   | 16.34                      | NO          | 0.079   | -0.29        | +                | 0.000   | 59.43               |
| 33              | 442898 | 5011691 | NO          | 0.146   | -42.47                     | NO          | 0.370   | -0.03        | NO               | 0.361   | -9.77               |

|    |        |         |    |       |         |    |       |       |    |       |         |
|----|--------|---------|----|-------|---------|----|-------|-------|----|-------|---------|
| 34 | 447499 | 5046000 | NO | 0.166 | -94.62  | +  | 0.032 | 0.20  | +  | 0.048 | 16.49   |
| 35 | 447156 | 5017275 | NO | 0.256 | 7.02    | NO | 0.087 | -0.25 | +  | 0.013 | 14.30   |
| 36 | 422764 | 5010225 | -  | 0.002 | -68.10  | +  | 0.032 | 0.30  | +  | 0.001 | 45.72   |
| 37 | 425297 | 5006327 | NO | 0.060 | -40.28  | NO | 0.094 | 0.32  | NO | 0.099 | -28.68  |
| 38 | 441173 | 5022025 | NO | 0.051 | 18.40   | -  | 0.009 | -0.59 | NO | 0.207 | 9.39    |
| 39 | 436470 | 5023662 | +  | 0.002 | 43.29   | NO | 0.189 | -0.13 | +  | 0.001 | 33.64   |
| 40 | 445275 | 5004805 | NO | 0.259 | -76.88  | NO | 0.462 | 0.07  | NO | 0.139 | -46.95  |
| 41 | 439762 | 5008176 | NO | 0.382 | -55.44  | NO | 0.366 | -0.11 | -  | 0.002 | -53.24  |
| 42 | 453185 | 5018585 | -  | 0.007 | -84.16  | NO | 0.254 | 0.03  | NO | 0.086 | -16.55  |
| 43 | 454706 | 5016087 | +  | 0.003 | 36.00   | -  | 0.043 | -0.34 | +  | 0.001 | 41.50   |
| 44 | 403757 | 5025864 | -  | 0.000 | -77.61  | NO | 0.263 | -0.04 | +  | 0.009 | 22.70   |
| 45 | 379296 | 4976762 | +  | 0.000 | 28.47   | -  | 0.005 | -0.29 | NO | 0.099 | -53.05  |
| 46 | 379521 | 4975338 | NO | 0.182 | 8.40    | -  | 0.000 | -0.41 | NO | 0.425 | -32.64  |
| 47 | 417575 | 5031188 | +  | 0.010 | 68.82   | NO | 0.119 | 0.07  | +  | 0.000 | 63.39   |
| 48 | 411034 | 5040779 | -  | 0.000 | -143.04 | NO | 0.087 | 0.17  | -  | 0.007 | -38.08  |
| 49 | 413095 | 5015532 | NO | 0.163 | -16.50  | NO | 0.258 | 0.22  | +  | 0.009 | 37.47   |
| 50 | 393820 | 4974372 | NO | 0.083 | 35.52   | NO | 0.077 | -0.11 | +  | 0.000 | 65.38   |
| 51 | 399090 | 4968086 | -  | 0.022 | -414.08 | NO | 0.389 | 0.14  | NO | 0.078 | -165.51 |
| 52 | 370832 | 4961182 | NO | 0.182 | 5.32    | -  | 0.007 | -0.47 | +  | 0.002 | 24.15   |
| 53 | 374289 | 4958943 | -  | 0.000 | -35.60  | NO | 0.215 | -0.12 | NO | 0.491 | -22.15  |
| 54 | 415044 | 5004152 | NO | 0.412 | -5.60   | NO | 0.185 | -0.04 | NO | 0.147 | -14.45  |
| 55 | 374326 | 4979406 | -  | 0.002 | -29.64  | NO | 0.296 | -0.16 | NO | 0.355 | -62.30  |
| 56 | 396999 | 5020420 | NO | 0.096 | -52.80  | -  | 0.002 | -0.46 | NO | 0.240 | -33.96  |
| 57 | 371117 | 4976180 | -  | 0.001 | -57.38  | NO | 0.220 | -0.19 | NO | 0.437 | -56.17  |
| 58 | 383423 | 5000542 | NO | 0.443 | -8.51   | -  | 0.008 | -0.27 | NO | 0.095 | -12.05  |
| 59 | 409644 | 5036382 | NO | 0.104 | 72.08   | NO | 0.432 | -0.04 | +  | 0.001 | 118.80  |
| 60 | 399235 | 5002734 | NO | 0.087 | 6.46    | -  | 0.019 | -0.16 | NO | 0.050 | 15.10   |
| 61 | 391697 | 4966165 | +  | 0.002 | 54.00   | -  | 0.048 | -0.26 | +  | 0.006 | 54.86   |
| 62 | 376438 | 4966114 | NO | 0.486 | -90.83  | NO | 0.378 | 0.06  | NO | 0.352 | -59.47  |
| 63 | 370049 | 4973748 | -  | 0.001 | -109.44 | NO | 0.242 | -0.16 | NO | 0.173 | 9.94    |
| 64 | 421145 | 5032568 | +  | 0.000 | 112.32  | NO | 0.431 | 0.04  | +  | 0.000 | 82.13   |
| 65 | 410297 | 4972658 | -  | 0.000 | -163.78 | -  | 0.005 | -0.36 | NO | 0.362 | 12.27   |
| 66 | 412077 | 4981762 | NO | 0.190 | 48.84   | -  | 0.007 | -0.40 | NO | 0.059 | 43.63   |
| 67 | 386005 | 4989319 | +  | 0.010 | 64.60   | -  | 0.010 | -0.30 | NO | 0.141 | -12.45  |
| 68 | 403079 | 4976570 | +  | 0.000 | 245.31  | NO | 0.073 | -0.16 | +  | 0.000 | 125.89  |
| 69 | 382728 | 4974545 | +  | 0.001 | 55.48   | -  | 0.000 | -0.37 | +  | 0.010 | 25.23   |
| 70 | 381057 | 4971571 | +  | 0.012 | 69.13   | NO | 0.062 | 0.14  | +  | 0.028 | 23.93   |
| 71 | 394050 | 4989295 | NO | 0.258 | 57.92   | +  | 0.006 | 0.31  | NO | 0.500 | 5.99    |
| 72 | 420078 | 5007807 | +  | 0.000 | 56.00   | -  | 0.000 | -0.04 | +  | 0.000 | 25.84   |
| 73 | 391725 | 4998065 | NO | 0.070 | -63.04  | NO | 0.107 | 0.17  | +  | 0.033 | 24.39   |
| 74 | 416464 | 5028409 | NO | 0.470 | -9.50   | NO | 0.410 | -0.08 | NO | 0.099 | -27.00  |
| 75 | 381119 | 4960816 | NO | 0.307 | -0.38   | NO | 0.064 | -0.16 | +  | 0.001 | 24.07   |
| 76 | 406624 | 5002532 | -  | 0.036 | -45.98  | -  | 0.015 | -0.24 | +  | 0.017 | 14.64   |
| 77 | 420220 | 4950783 | NO | 0.349 | -45.63  | +  | 0.019 | 0.21  | NO | 0.091 | 43.98   |
| 78 | 420679 | 4948607 | NO | 0.316 | 64.40   | NO | 0.318 | 0.08  | -  | 0.034 | -29.59  |
| 79 | 424528 | 4951149 | NO | 0.152 | 9.36    | NO | 0.063 | 0.20  | NO | 0.177 | -18.49  |
| 80 | 423838 | 4952456 | +  | 0.017 | 63.60   | -  | 0.018 | -0.16 | +  | 0.001 | 51.34   |
| 81 | 368434 | 4954229 | NO | 0.074 | 21.12   | NO | 0.289 | -0.10 | NO | 0.124 | 8.74    |
| 82 | 407203 | 4930757 | NO | 0.301 | -33.93  | NO | 0.163 | 0.13  | NO | 0.421 | 16.38   |

|     |        |         |    |       |         |    |       |       |    |       |         |
|-----|--------|---------|----|-------|---------|----|-------|-------|----|-------|---------|
| 83  | 410021 | 4948054 | NO | 0.175 | -8.40   | NO | 0.113 | -0.17 | NO | 0.171 | -6.50   |
| 84  | 408454 | 4948831 | NO | 0.100 | 136.96  | -  | 0.021 | -0.34 | NO | 0.095 | 44.82   |
| 85  | 375159 | 4918614 | NO | 0.188 | -33.20  | NO | 0.295 | 0.08  | NO | 0.233 | -21.81  |
| 86  | 377719 | 4922554 | +  | 0.006 | 60.84   | NO | 0.322 | -0.04 | +  | 0.016 | 45.53   |
| 87  | 410477 | 4926217 | NO | 0.118 | 29.64   | NO | 0.409 | 0.04  | NO | 0.481 | 8.05    |
| 88  | 406835 | 4926682 | +  | 0.000 | 99.84   | NO | 0.271 | -0.08 | NO | 0.121 | -23.74  |
| 89  | 390551 | 4921087 | -  | 0.039 | -89.31  | NO | 0.072 | 0.38  | NO | 0.074 | -54.98  |
| 90  | 392828 | 4950513 | +  | 0.004 | 76.76   | +  | 0.016 | 0.16  | +  | 0.000 | 56.75   |
| 91  | 387328 | 4927683 | NO | 0.349 | -127.53 | NO | 0.104 | 0.33  | NO | 0.254 | -137.96 |
| 92  | 407995 | 4943014 | NO | 0.158 | -6.63   | -  | 0.001 | -0.50 | NO | 0.141 | -6.58   |
| 93  | 409531 | 4946291 | NO | 0.321 | 33.82   | NO | 0.251 | 0.08  | NO | 0.346 | 11.02   |
| 94  | 389171 | 4919348 | NO | 0.161 | 42.90   | NO | 0.208 | 0.08  | NO | 0.354 | 7.73    |
| 95  | 393810 | 4934491 | +  | 0.000 | 126.75  | -  | 0.017 | -0.21 | +  | 0.002 | 39.52   |
| 96  | 398575 | 4933172 | +  | 0.000 | 107.64  | -  | 0.012 | -0.13 | +  | 0.009 | 32.27   |
| 97  | 390783 | 4930811 | +  | 0.036 | 72.20   | NO | 0.455 | 0.00  | NO | 0.234 | 33.23   |
| 98  | 398788 | 4935530 | NO | 0.432 | 2.79    | +  | 0.038 | 0.23  | +  | 0.023 | 21.39   |
| 99  | 393728 | 4939886 | +  | 0.005 | 70.00   | NO | 0.215 | 0.08  | NO | 0.113 | 28.91   |
| 100 | 384199 | 4941327 | NO | 0.359 | -16.00  | NO | 0.163 | -0.08 | NO | 0.474 | 6.92    |
| 101 | 385060 | 4942990 | NO | 0.117 | -28.40  | NO | 0.478 | -0.04 | NO | 0.491 | -0.91   |
| 102 | 395849 | 4918029 | NO | 0.310 | 15.99   | NO | 0.088 | -0.13 | NO | 0.180 | -4.62   |
| 103 | 393985 | 4918416 | -  | 0.006 | -52.26  | -  | 0.044 | -0.17 | -  | 0.018 | -23.63  |
| 104 | 390755 | 4948899 | +  | 0.000 | 89.31   | NO | 0.421 | -0.08 | NO | 0.059 | 29.28   |
| 105 | 397616 | 4917870 | -  | 0.000 | -72.54  | -  | 0.030 | -0.29 | -  | 0.042 | -23.93  |
| 106 | 397318 | 4924370 | -  | 0.001 | -85.80  | NO | 0.438 | -0.08 | NO | 0.272 | -7.98   |
| 107 | 383428 | 4957802 | +  | 0.001 | 141.40  | NO | 0.122 | 0.24  | +  | 0.003 | 77.28   |
| 108 | 397366 | 4919950 | -  | 0.001 | -627.84 | NO | 0.201 | 0.03  | NO | 0.108 | 6.45    |
| 109 | 407571 | 4937396 | +  | 0.003 | 43.29   | NO | 0.180 | 0.08  | +  | 0.000 | 47.41   |
| 110 | 427045 | 4955288 | NO | 0.218 | 395.20  | NO | 0.071 | 0.17  | -  | 0.028 | -52.13  |
| 111 | 412885 | 4936108 | NO | 0.205 | -31.98  | NO | 0.105 | -0.16 | NO | 0.408 | 6.05    |
| 112 | 411644 | 4929873 | -  | 0.004 | -38.61  | NO | 0.448 | 0.04  | NO | 0.439 | 4.94    |
| 113 | 411348 | 4928365 | -  | 0.004 | -63.46  | NO | 0.354 | -0.04 | NO | 0.306 | 9.65    |
| 114 | 392883 | 4957189 | +  | 0.001 | 112.80  | NO | 0.104 | 0.13  | NO | 0.313 | 7.80    |
| 115 | 394059 | 4962580 | +  | 0.000 | 150.93  | NO | 0.079 | -0.21 | +  | 0.000 | 82.60   |
| 116 | 376198 | 4953115 | -  | 0.000 | -167.70 | NO | 0.447 | 0.00  | -  | 0.000 | -67.67  |
| 117 | 399597 | 4922965 | NO | 0.121 | -23.94  | NO | 0.258 | 0.25  | NO | 0.287 | -4.58   |
| 118 | 397775 | 4922026 | NO | 0.051 | -17.55  | NO | 0.273 | 0.04  | NO | 0.058 | 14.72   |
| 119 | 399761 | 4924478 | +  | 0.000 | 100.23  | NO | 0.065 | -0.13 | NO | 0.247 | 14.25   |
| 120 | 400972 | 4918591 | NO | 0.419 | 9.36    | -  | 0.001 | -0.41 | NO | 0.272 | -5.83   |
| 121 | 406511 | 4937545 | -  | 0.037 | -64.40  | NO | 0.345 | 0.04  | -  | 0.005 | -39.68  |
| 122 | 379941 | 4946409 | -  | 0.005 | -96.14  | +  | 0.001 | 0.40  | NO | 0.500 | -9.66   |
| 123 | 378193 | 4948599 | NO | 0.064 | 55.77   | NO | 0.285 | 0.08  | +  | 0.006 | 32.45   |
| 124 | 416406 | 4949177 | NO | 0.363 | 62.40   | NO | 0.057 | 0.16  | NO | 0.363 | 28.18   |
| 125 | 397660 | 4928291 | NO | 0.077 | -7.41   | NO | 0.208 | -0.04 | -  | 0.032 | -7.48   |
| 126 | 400828 | 4926212 | NO | 0.406 | -15.96  | NO | 0.329 | -0.04 | -  | 0.022 | -24.50  |
| 127 | 388883 | 4936682 | +  | 0.001 | 70.59   | NO | 0.358 | -0.08 | NO | 0.500 | 5.93    |
| 128 | 393531 | 4945229 | +  | 0.000 | 100.80  | NO | 0.180 | -0.08 | +  | 0.022 | 48.91   |
| 129 | 388411 | 4942647 | NO | 0.433 | -1.95   | NO | 0.169 | -0.04 | NO | 0.362 | 10.01   |
| 130 | 391775 | 4940995 | +  | 0.018 | 37.20   | NO | 0.302 | 0.04  | NO | 0.189 | 10.17   |
| 131 | 388138 | 4944099 | NO | 0.081 | 26.40   | NO | 0.434 | 0.04  | NO | 0.145 | 10.17   |

|     |        |         |    |       |         |    |       |       |    |       |         |
|-----|--------|---------|----|-------|---------|----|-------|-------|----|-------|---------|
| 132 | 391180 | 4937300 | NO | 0.078 | -78.66  | +  | 0.013 | 0.20  | NO | 0.254 | 11.45   |
| 133 | 385090 | 4950153 | NO | 0.495 | 2.66    | NO | 0.344 | 0.00  | NO | 0.421 | -0.48   |
| 134 | 383274 | 4930275 | NO | 0.131 | -205.22 | +  | 0.041 | 0.27  | NO | 0.383 | -61.18  |
| 135 | 383294 | 4954747 | NO | 0.486 | 13.20   | NO | 0.095 | 0.13  | NO | 0.362 | 1.25    |
| 136 | 399765 | 4929504 | -  | 0.029 | -54.00  | NO | 0.452 | 0.00  | NO | 0.076 | 7.02    |
| 137 | 382725 | 4935509 | +  | 0.011 | 70.00   | -  | 0.040 | -0.13 | NO | 0.054 | 46.10   |
| 138 | 383599 | 4933087 | NO | 0.123 | 30.81   | NO | 0.114 | -0.13 | NO | 0.291 | -0.16   |
| 139 | 386249 | 4934876 | +  | 0.017 | 65.91   | NO | 0.478 | -0.04 | NO | 0.362 | 4.47    |
| 140 | 433747 | 4965864 | -  | 0.001 | 15.81   | NO | 0.085 | 0.20  | NO | 0.209 | 27.86   |
| 141 | 438826 | 4970977 | NO | 0.054 | -171.52 | NO | 0.218 | -0.14 | NO | 0.391 | -36.18  |
| 142 | 442354 | 4972751 | +  | 0.035 | 23.60   | NO | 0.266 | 0.04  | NO | 0.259 | -30.89  |
| 143 | 440867 | 4972794 | +  | 0.002 | 1192.44 | NO | 0.286 | 0.00  | NO | 0.137 | -27.55  |
| 144 | 435927 | 4972173 | +  | 0.000 | 3291.94 | +  | 0.044 | 0.24  | NO | 0.264 | 37.00   |
| 145 | 434905 | 4968276 | +  | 0.050 | 148.96  | NO | 0.234 | -0.12 | NO | 0.272 | 49.10   |
| 146 | 440119 | 4969789 | -  | 0.000 | -441.94 | NO | 0.449 | 0.04  | -  | 0.007 | -108.96 |
| 147 | 444953 | 4969522 | NO | 0.377 | 133.76  | NO | 0.248 | -0.16 | +  | 0.011 | 117.97  |
| 148 | 432910 | 4961801 | NO | 0.490 | 270.56  | NO | 0.328 | 0.04  | NO | 0.199 | 72.42   |
| 149 | 434676 | 4964576 | -  | 0.000 | -460.20 | NO | 0.157 | 0.08  | NO | 0.169 | -12.23  |
| 150 | 432924 | 4963711 | -  | 0.004 | -133.20 | NO | 0.487 | 0.04  | NO | 0.076 | 11.13   |
| 151 | 433615 | 4963121 | -  | 0.041 | -187.98 | NO | 0.354 | 0.12  | +  | 0.049 | 43.13   |
| 152 | 436461 | 4967268 | -  | 0.000 | -266.37 | +  | 0.042 | 0.32  | NO | 0.244 | 26.18   |
| 153 | 450408 | 4968082 | NO | 0.104 | -18.24  | NO | 0.096 | 0.16  | NO | 0.426 | 7.55    |
| 154 | 448503 | 4968845 | NO | 0.241 | -29.64  | NO | 0.184 | -0.21 | NO | 0.099 | 41.53   |
| 155 | 449471 | 4967105 | NO | 0.281 | 83.46   | NO | 0.385 | -0.04 | NO | 0.207 | 60.48   |
| 156 | 416044 | 4975602 | +  | 0.025 | 159.96  | NO | 0.260 | -0.13 | NO | 0.056 | 29.92   |
| 157 | 469646 | 5044155 | +  | 0.000 | 56.40   | NO | 0.135 | -0.08 | +  | 0.022 | 6.76    |
| 158 | 457790 | 5033922 | NO | 0.051 | 75.20   | +  | 0.000 | 0.82  | +  | 0.002 | 45.02   |
| 159 | 477396 | 5018921 | +  | 0.000 | 112.10  | NO | 0.101 | -0.12 | +  | 0.004 | 66.30   |
| 160 | 458841 | 5062793 | NO | 0.200 | -16.00  | NO | 0.299 | -0.08 | +  | 0.002 | 11.98   |
| 161 | 460240 | 5060179 | -  | 0.002 | -14.80  | NO | 0.472 | 0.00  | NO | 0.144 | 3.80    |
| 162 | 457184 | 5065113 | NO | 0.147 | -8.80   | NO | 0.085 | -0.12 | +  | 0.028 | 10.56   |
| 163 | 464395 | 5040665 | +  | 0.006 | 11.60   | -  | 0.041 | -0.28 | +  | 0.002 | 11.36   |
| 164 | 472182 | 5039240 | -  | 0.001 | -36.27  | NO | N/A   | 0.07  | NO | 0.467 | 4.10    |
| 165 | 476138 | 5042040 | NO | 0.269 | -1.85   | NO | 0.268 | 0.11  | NO | 0.243 | -16.97  |
| 166 | 454414 | 5042392 | +  | 0.002 | 22.62   | NO | 0.399 | -0.08 | +  | 0.041 | 7.23    |
| 167 | 485083 | 5027522 | +  | 0.000 | 73.71   | -  | 0.020 | -0.31 | +  | 0.000 | 49.25   |
| 168 | 457016 | 5057958 | NO | 0.063 | -7.02   | NO | 0.437 | 0.08  | +  | 0.009 | 10.82   |
| 169 | 473028 | 5027115 | NO | 0.316 | -33.06  | +  | 0.002 | 0.70  | NO | 0.053 | 20.88   |
| 170 | 454744 | 5048800 | NO | 0.343 | 8.00    | NO | 0.388 | 0.10  | +  | 0.010 | 16.83   |
| 171 | 449383 | 5058135 | +  | 0.023 | 27.38   | NO | 0.106 | 0.07  | +  | 0.042 | 22.43   |
| 172 | 465047 | 5046124 | -  | 0.000 | -59.52  | NO | 0.068 | 0.31  | NO | 0.289 | 1.96    |
| 173 | 473338 | 5032214 | -  | 0.048 | -62.16  | NO | 0.303 | -0.19 | NO | 0.175 | -23.93  |
| 174 | 470223 | 5049121 | +  | 0.000 | 37.37   | NO | 0.235 | -0.11 | +  | 0.002 | 14.93   |
| 175 | 478253 | 5027189 | NO | 0.327 | -0.78   | +  | 0.007 | 0.39  | NO | 0.200 | 8.70    |
| 176 | 479283 | 5030307 | NO | 0.331 | -5.44   | NO | 0.285 | 0.10  | +  | 0.026 | 19.54   |
| 177 | 472789 | 5022083 | NO | 0.319 | 26.27   | NO | 0.313 | 0.04  | +  | 0.003 | 28.31   |
| 178 | 468354 | 4971538 | -  | 0.005 | -507.16 | -  | 0.003 | -0.79 | NO | 0.134 | -187.03 |
| 179 | 464776 | 4977596 | -  | 0.000 | -130.34 | NO | 0.210 | 0.12  | NO | 0.356 | -3.13   |
| 180 | 472782 | 4973998 | +  | 0.000 | 93.10   | NO | 0.138 | -0.16 | +  | 0.001 | 61.87   |

|     |        |         |    |       |         |    |       |       |    |       |        |
|-----|--------|---------|----|-------|---------|----|-------|-------|----|-------|--------|
| 181 | 452986 | 5002995 | NO | 0.207 | -9.50   | NO | 0.151 | -0.08 | +  | 0.035 | 38.81  |
| 182 | 452945 | 5004061 | -  | 0.008 | -228.00 | +  | 0.004 | 0.72  | -  | 0.003 | -74.98 |
| 183 | 463025 | 4993054 | +  | 0.016 | 76.76   | NO | 0.237 | 0.16  | +  | 0.028 | 39.58  |
| 184 | 462220 | 5000967 | +  | 0.013 | 98.04   | NO | 0.064 | -0.16 | +  | 0.002 | 64.90  |
| 185 | 459428 | 5001273 | +  | 0.001 | 76.38   | -  | 0.040 | -0.20 | +  | 0.003 | 68.52  |
| 186 | 458418 | 4998811 | NO | 0.098 | 21.06   | NO | 0.482 | -0.08 | NO | 0.137 | 22.68  |
| 187 | 460557 | 4994282 | NO | 0.192 | 104.13  | NO | 0.455 | -0.08 | NO | 0.082 | 53.95  |
| 188 | 460047 | 4997034 | +  | 0.000 | 178.23  | NO | 0.069 | -0.21 | +  | 0.043 | 46.27  |
| 189 | 463550 | 4959526 | +  | 0.000 | 757.38  | -  | 0.023 | -0.16 | +  | 0.038 | 53.68  |
| 190 | 468470 | 4962083 | +  | 0.000 | 309.27  | NO | 0.058 | -0.17 | NO | 0.117 | -5.38  |
| 191 | 468638 | 4965020 | NO | 0.410 | 11.40   | NO | 0.303 | -0.12 | NO | 0.447 | 9.09   |
| 192 | 466699 | 4965219 | NO | 0.082 | -289.85 | NO | 0.078 | 0.41  | NO | 0.304 | 54.21  |
| 193 | 493242 | 4980992 | +  | 0.000 | 134.16  | NO | 0.245 | -0.08 | NO | 0.366 | 35.79  |
| 194 | 490407 | 4976795 | NO | 0.065 | 83.46   | NO | 0.341 | 0.00  | NO | 0.136 | 18.83  |
| 195 | 490494 | 4980400 | +  | 0.024 | 107.10  | -  | 0.015 | -0.27 | +  | 0.029 | 19.49  |
| 196 | 456944 | 4972141 | +  | 0.000 | 188.76  | NO | 0.483 | 0.04  | +  | 0.006 | 63.05  |
| 197 | 461715 | 4963864 | NO | 0.155 | 19.50   | NO | 0.364 | 0.00  | +  | 0.000 | 89.86  |
| 198 | 462834 | 4997880 | -  | 0.000 | -142.40 | NO | 0.264 | -0.03 | -  | 0.006 | -49.08 |
| 199 | 463955 | 4997925 | +  | 0.010 | 45.98   | NO | 0.341 | 0.00  | NO | 0.460 | 17.02  |
| 200 | 465091 | 4996050 | NO | 0.249 | 12.09   | NO | 0.322 | 0.08  | NO | 0.173 | 17.16  |
| 201 | 471682 | 4967057 | +  | 0.001 | 83.22   | NO | 0.071 | -0.21 | NO | 0.053 | 26.93  |
| 202 | 471936 | 4964268 | +  | 0.008 | 72.58   | NO | 0.099 | -0.25 | NO | 0.128 | 33.63  |
| 203 | 474313 | 4964995 | -  | 0.040 | -104.70 | NO | 0.167 | 0.13  | NO | 0.078 | -51.11 |
| 204 | 465968 | 4989376 | -  | 0.035 | -123.88 | +  | 0.013 | 0.32  | NO | 0.355 | 16.25  |
| 205 | 488466 | 4984781 | +  | 0.000 | 250.38  | NO | 0.060 | -0.17 | +  | 0.000 | 53.52  |
| 206 | 488495 | 4984747 | +  | 0.000 | 223.86  | NO | 0.147 | -0.13 | +  | 0.046 | 31.37  |
| 207 | 486538 | 4986038 | +  | 0.001 | 74.86   | NO | 0.085 | -0.17 | NO | 0.450 | -1.99  |
| 208 | 484932 | 4984660 | +  | 0.000 | 217.23  | NO | 0.128 | -0.17 | NO | 0.185 | 26.88  |
| 209 | 486494 | 4986062 | +  | 0.000 | 92.04   | NO | 0.428 | -0.04 | NO | 0.267 | 20.21  |
| 210 | 453817 | 4968883 | -  | 0.013 | -116.10 | -  | 0.025 | -0.27 | NO | 0.294 | 6.45   |
| 211 | 447585 | 5001945 | NO | 0.067 | -24.70  | NO | 0.206 | -0.04 | NO | 0.292 | -14.64 |
| 212 | 486314 | 4954549 | NO | 0.132 | 50.00   | -  | 0.004 | -0.59 | NO | 0.355 | 17.50  |
| 213 | 482842 | 4957150 | -  | 0.001 | -60.16  | NO | 0.085 | 0.24  | NO | 0.220 | 7.25   |
| 214 | 495717 | 4978307 | +  | 0.000 | 123.24  | NO | 0.087 | 0.08  | +  | 0.027 | 48.21  |
| 215 | 482191 | 4963931 | NO | 0.054 | 30.81   | NO | 0.113 | -0.16 | NO | 0.066 | 17.89  |
| 216 | 483340 | 4960178 | NO | 0.490 | 6.84    | NO | 0.495 | 0.00  | NO | 0.222 | -9.45  |
| 217 | 471528 | 4957161 | +  | 0.000 | 62.00   | NO | 0.397 | 0.00  | +  | 0.003 | 32.16  |
| 218 | 459887 | 4976370 | +  | 0.000 | 451.06  | NO | 0.299 | -0.08 | +  | 0.002 | 117.74 |
| 219 | 482053 | 4980423 | NO | 0.062 | 53.60   | NO | 0.147 | -0.08 | +  | 0.001 | 93.31  |
| 220 | 483489 | 4975687 | +  | 0.024 | 186.96  | NO | 0.306 | -0.16 | NO | 0.206 | 29.99  |
| 221 | 481184 | 4978377 | NO | 0.062 | -74.88  | NO | 0.253 | -0.21 | NO | 0.122 | 17.64  |
| 222 | 460131 | 4973686 | +  | 0.000 | 201.20  | NO | 0.180 | 0.17  | NO | 0.251 | -13.44 |
| 223 | 487354 | 4974998 | +  | 0.029 | 57.20   | NO | 0.452 | -0.04 | NO | 0.056 | 34.39  |
| 224 | 488823 | 4972151 | NO | 0.125 | -32.00  | NO | 0.060 | 0.17  | NO | 0.072 | 38.92  |
| 225 | 491302 | 4973263 | +  | 0.016 | 94.62   | NO | 0.162 | -0.08 | +  | 0.003 | 85.31  |
| 226 | 484015 | 4972999 | NO | 0.444 | -42.80  | NO | 0.392 | 0.04  | NO | 0.421 | -3.34  |
| 227 | 485066 | 4968622 | NO | 0.204 | -72.96  | +  | 0.005 | 0.34  | NO | 0.353 | 11.28  |

*Results of the trend analysis for EC, pH and HCO<sub>3</sub>.*

| Monitoring well | Na          |         |                     | Cl          |         |                     | NO <sub>3</sub> |         |                     |
|-----------------|-------------|---------|---------------------|-------------|---------|---------------------|-----------------|---------|---------------------|
|                 | Test Result | p-value | OLS [mg/L] 21 years | Test Result | p-value | OLS [mg/L] 21 years | Test Result     | p-value | OLS [mg/L] 21 years |
| 1               | -           | 0.000   | -8.57               | NO          | 0.147   | -0.11               | NO              | 0.211   | -1.60               |
| 2               | NO          | 0.186   | -0.83               | -           | 0.010   | -0.15               | -               | 0.004   | -9.76               |
| 3               | +           | 0.016   | 1.30                | NO          | 0.329   | -0.05               | NO              | 0.124   | 1.48                |
| 4               | NO          | 0.053   | -1.45               | -           | 0.000   | -0.21               | -               | 0.002   | -16.65              |
| 5               | -           | 0.006   | -5.20               | -           | 0.000   | -0.44               | -               | 0.001   | -24.73              |
| 6               | NO          | 0.313   | -0.65               | NO          | 0.257   | -0.04               | -               | 0.006   | -27.76              |
| 7               | -           | 0.000   | -2.75               | NO          | 0.056   | -0.04               | +               | 0.000   | 2.62                |
| 8               | +           | 0.008   | 4.16                | -           | 0.000   | -1.36               | -               | 0.000   | -20.00              |
| 9               | NO          | 0.291   | 1.30                | NO          | 0.500   | 0.02                | NO              | 0.096   | 20.52               |
| 10              | +           | 0.000   | 2.16                | +           | 0.000   | 0.17                | +               | 0.003   | 1.09                |
| 11              | +           | 0.001   | 5.24                | NO          | 0.138   | 0.12                | NO              | 0.419   | 0.82                |
| 12              | -           | 0.000   | -5.40               | -           | 0.010   | -0.18               | -               | 0.000   | -21.29              |
| 13              | NO          | 0.126   | -1.80               | -           | 0.000   | -0.19               | NO              | 0.070   | -21.36              |
| 14              | NO          | 0.259   | -0.05               | +           | 0.000   | 0.17                | NO              | 0.195   | 0.70                |
| 15              | +           | 0.028   | 1.92                | NO          | 0.481   | 0.00                | -               | 0.024   | -5.57               |
| 16              | NO          | 0.345   | -0.10               | -           | 0.000   | -0.19               | -               | 0.000   | -16.76              |
| 17              | NO          | N/A     | 0.00                | NO          | 0.064   | -0.09               | -               | 0.027   | -2.05               |
| 18              | +           | 0.000   | 2.52                | NO          | 0.054   | 0.05                | NO              | 0.138   | 2.50                |
| 19              | +           | 0.000   | 30.36               | +           | 0.000   | 0.27                | NO              | 0.235   | -0.36               |
| 20              | -           | 0.042   | -1.68               | NO          | 0.051   | 0.07                | -               | 0.000   | -7.72               |
| 21              | NO          | 0.120   | 0.48                | -           | 0.000   | -0.13               | -               | 0.039   | -2.15               |
| 22              | +           | 0.000   | 1.32                | -           | 0.010   | -0.04               | NO              | 0.430   | -1.56               |
| 23              | -           | 0.000   | -18.51              | -           | 0.000   | -0.75               | -               | 0.013   | -3.97               |
| 24              | NO          | 0.406   | 0.13                | NO          | 0.468   | 0.02                | NO              | 0.060   | -14.56              |
| 25              | NO          | 0.052   | 0.34                | NO          | 0.086   | 0.03                | NO              | 0.302   | 0.48                |
| 26              | +           | 0.001   | 0.65                | -           | 0.001   | -0.02               | -               | 0.000   | -7.04               |
| 27              | +           | 0.000   | 1.61                | +           | 0.001   | 0.07                | NO              | 0.204   | -0.93               |
| 28              | NO          | 0.123   | -0.56               | NO          | 0.143   | -0.09               | NO              | 0.419   | -1.55               |
| 29              | NO          | 0.338   | -0.35               | NO          | 0.077   | -0.07               | -               | 0.000   | -6.14               |
| 30              | +           | 0.000   | 2.42                | +           | 0.018   | 0.10                | NO              | 0.060   | -5.38               |
| 31              | +           | 0.002   | 1.66                | NO          | 0.500   | -0.07               | -               | 0.000   | -2.93               |
| 32              | NO          | 0.473   | -0.46               | -           | 0.029   | -0.06               | -               | 0.001   | -2.89               |
| 33              | +           | 0.041   | 0.29                | NO          | 0.112   | -0.14               | +               | 0.040   | 7.78                |
| 34              | NO          | 0.356   | -1.98               | NO          | 0.054   | -0.71               | NO              | 0.055   | -5.58               |
| 35              | NO          | 0.199   | -0.50               | NO          | 0.278   | -0.01               | NO              | 0.399   | -0.28               |
| 36              | +           | 0.006   | 1.90                | NO          | 0.090   | -0.09               | -               | 0.003   | -21.89              |
| 37              | +           | 0.000   | 2.79                | +           | 0.045   | 0.03                | -               | 0.007   | -11.59              |
| 38              | +           | 0.005   | 1.52                | +           | 0.005   | 0.10                | NO              | 0.127   | -1.88               |
| 39              | +           | 0.000   | 3.85                | +           | 0.000   | 0.14                | -               | 0.002   | -1.64               |
| 40              | NO          | 0.323   | -1.18               | NO          | 0.198   | 0.01                | NO              | 0.200   | -1.52               |
| 41              | -           | 0.002   | -34.83              | NO          | 0.284   | 0.03                | +               | 0.035   | 4.07                |
| 42              | NO          | 0.138   | -0.91               | NO          | 0.373   | -0.14               | NO              | 0.146   | 2.17                |
| 43              | +           | 0.000   | 29.78               | +           | 0.000   | 0.33                | -               | 0.000   | -8.28               |
| 44              | -           | 0.028   | -1.50               | -           | 0.000   | -0.17               | -               | 0.000   | -23.83              |
| 45              | +           | 0.001   | 1.33                | NO          | 0.051   | 0.07                | +               | 0.000   | 17.12               |

|    |    |       |        |    |       |       |    |       |        |
|----|----|-------|--------|----|-------|-------|----|-------|--------|
| 46 | +  | 0.000 | 1.33   | NO | 0.110 | 0.04  | NO | 0.173 | 4.76   |
| 47 | +  | 0.000 | 3.50   | +  | 0.000 | 0.14  | NO | 0.129 | -1.15  |
| 48 | NO | 0.353 | 0.64   | +  | 0.000 | 0.12  | -  | 0.006 | -6.30  |
| 49 | NO | 0.086 | 0.94   | +  | 0.000 | 0.15  | -  | 0.000 | -4.32  |
| 50 | +  | 0.000 | 1.98   | +  | 0.000 | 0.15  | NO | 0.347 | -2.52  |
| 51 | NO | 0.078 | -8.40  | NO | 0.058 | -0.33 | NO | 0.337 | -6.14  |
| 52 | +  | 0.005 | 0.18   | +  | 0.001 | 0.02  | -  | 0.008 | -3.15  |
| 53 | -  | 0.001 | -1.75  | NO | 0.059 | -0.03 | -  | 0.048 | -3.00  |
| 54 | -  | 0.014 | -1.08  | NO | 0.063 | -0.05 | -  | 0.008 | -6.84  |
| 55 | -  | 0.001 | -2.75  | -  | 0.021 | -0.11 | NO | 0.440 | -0.42  |
| 56 | +  | 0.000 | 1.44   | NO | 0.058 | 0.09  | -  | 0.005 | -6.68  |
| 57 | NO | 0.054 | -3.31  | NO | 0.465 | -0.01 | NO | 0.083 | -8.97  |
| 58 | NO | 0.269 | 0.16   | +  | 0.047 | 0.00  | -  | 0.010 | -1.00  |
| 59 | +  | 0.000 | 6.99   | +  | 0.006 | 0.18  | -  | 0.000 | -7.00  |
| 60 | +  | 0.000 | 2.84   | +  | 0.018 | 0.07  | NO | 0.342 | -1.00  |
| 61 | +  | 0.001 | 0.64   | +  | 0.000 | 0.13  | +  | 0.000 | 5.18   |
| 62 | NO | 0.500 | -2.41  | NO | 0.142 | -0.22 | NO | 0.139 | -16.10 |
| 63 | -  | 0.002 | -4.15  | -  | 0.000 | -0.30 | -  | 0.003 | -38.10 |
| 64 | -  | 0.020 | -1.01  | +  | 0.011 | 0.23  | +  | 0.000 | 13.48  |
| 65 | -  | 0.018 | -5.83  | -  | 0.002 | -0.42 | -  | 0.000 | -21.28 |
| 66 | NO | 0.439 | -0.48  | NO | 0.129 | -0.14 | NO | 0.460 | 3.42   |
| 67 | +  | 0.008 | 1.14   | +  | 0.000 | 0.22  | +  | 0.001 | 4.52   |
| 68 | +  | 0.000 | 3.50   | +  | 0.000 | 0.31  | -  | 0.043 | -3.49  |
| 69 | +  | 0.000 | 0.90   | +  | 0.000 | 0.17  | +  | 0.000 | 18.60  |
| 70 | +  | 0.001 | 1.38   | +  | 0.011 | 0.15  | NO | 0.269 | 3.87   |
| 71 | NO | 0.445 | 0.55   | +  | 0.000 | 0.38  | NO | 0.064 | -0.45  |
| 72 | +  | 0.000 | 4.75   | +  | 0.000 | 0.34  | -  | 0.008 | -3.52  |
| 73 | NO | 0.092 | 0.83   | +  | 0.036 | 0.06  | NO | 0.302 | 0.96   |
| 74 | NO | 0.067 | 1.08   | NO | 0.189 | 0.02  | NO | 0.104 | -5.42  |
| 75 | NO | 0.266 | -0.15  | +  | 0.001 | 0.00  | NO | 0.214 | -2.24  |
| 76 | +  | 0.043 | 1.36   | NO | 0.381 | 0.04  | -  | 0.000 | -8.78  |
| 77 | NO | 0.256 | 3.43   | NO | 0.363 | 0.05  | NO | 0.285 | 0.70   |
| 78 | +  | 0.000 | 11.26  | NO | 0.253 | 0.06  | +  | 0.042 | 10.98  |
| 79 | +  | 0.003 | 23.41  | +  | 0.004 | 0.91  | NO | 0.325 | -12.81 |
| 80 | NO | 0.500 | -1.49  | NO | 0.096 | -0.20 | NO | 0.092 | 4.20   |
| 81 | +  | 0.032 | 1.97   | +  | 0.011 | 0.20  | -  | 0.040 | -0.74  |
| 82 | NO | 0.051 | -20.33 | -  | 0.001 | -0.48 | NO | 0.314 | -3.81  |
| 83 | -  | 0.000 | -9.67  | +  | 0.000 | 0.06  | +  | 0.014 | 0.92   |
| 84 | +  | 0.000 | 37.80  | +  | 0.026 | 1.26  | NO | 0.248 | 2.85   |
| 85 | +  | 0.009 | 0.98   | +  | 0.000 | 0.17  | NO | 0.253 | 1.20   |
| 86 | +  | 0.001 | 0.98   | +  | 0.000 | 0.09  | NO | 0.098 | 6.56   |
| 87 | +  | 0.000 | 5.45   | +  | 0.013 | 0.17  | +  | 0.000 | 10.00  |
| 88 | +  | 0.021 | 7.91   | +  | 0.011 | 0.61  | -  | 0.028 | -6.72  |
| 89 | NO | 0.283 | 0.17   | NO | 0.224 | -0.04 | -  | 0.040 | -11.90 |
| 90 | +  | 0.000 | 3.63   | NO | 0.205 | 0.02  | +  | 0.004 | 5.30   |
| 91 | -  | 0.044 | -1.58  | NO | 0.423 | -0.01 | NO | 0.195 | -7.41  |
| 92 | +  | 0.001 | 3.38   | NO | 0.204 | -0.08 | NO | 0.355 | 4.64   |
| 93 | +  | 0.000 | 5.40   | +  | 0.008 | 0.20  | NO | 0.219 | 3.74   |
| 94 | +  | 0.046 | 0.67   | NO | 0.068 | 0.03  | NO | 0.230 | -2.18  |

|     |    |       |         |    |       |       |    |       |        |
|-----|----|-------|---------|----|-------|-------|----|-------|--------|
| 95  | NO | 0.110 | 0.60    | +  | 0.000 | 0.13  | +  | 0.000 | 10.20  |
| 96  | +  | 0.000 | 2.23    | +  | 0.000 | 0.33  | +  | 0.001 | 12.20  |
| 97  | NO | 0.151 | 0.92    | NO | 0.113 | 0.06  | +  | 0.024 | 8.23   |
| 98  | NO | 0.198 | 0.78    | NO | 0.087 | 0.15  | NO | 0.259 | -3.72  |
| 99  | +  | 0.000 | 3.17    | NO | 0.481 | 0.04  | +  | 0.000 | 13.52  |
| 100 | NO | 0.263 | -61.23  | +  | 0.002 | 0.08  | +  | 0.001 | 4.08   |
| 101 | +  | 0.000 | 1.31    | +  | 0.001 | 0.07  | NO | 0.224 | 0.64   |
| 102 | +  | 0.000 | 1.73    | +  | 0.001 | 0.08  | +  | 0.001 | 15.02  |
| 103 | +  | 0.009 | 0.50    | NO | 0.063 | 0.03  | NO | 0.096 | -2.18  |
| 104 | +  | 0.000 | 2.60    | +  | 0.041 | 0.07  | +  | 0.000 | 10.88  |
| 105 | NO | 0.336 | 0.28    | NO | 0.102 | 0.00  | NO | 0.113 | -1.72  |
| 106 | NO | 0.096 | -1.44   | -  | 0.005 | -0.12 | -  | 0.006 | -23.79 |
| 107 | +  | 0.004 | 3.56    | +  | 0.001 | 0.38  | NO | 0.157 | 2.52   |
| 108 | -  | 0.001 | -117.36 | -  | 0.001 | -6.62 | -  | 0.035 | -4.48  |
| 109 | +  | 0.004 | 4.44    | +  | 0.000 | 0.18  | NO | 0.325 | 0.24   |
| 110 | NO | 0.207 | -18.20  | NO | 0.292 | 3.47  | -  | 0.005 | -11.56 |
| 111 | +  | 0.020 | 15.80   | NO | 0.128 | 0.63  | -  | 0.013 | -20.67 |
| 112 | NO | 0.289 | 0.22    | -  | 0.000 | -0.13 | -  | 0.001 | -15.60 |
| 113 | +  | 0.000 | 4.78    | NO | 0.092 | -0.16 | -  | 0.000 | -33.34 |
| 114 | +  | 0.000 | 8.83    | +  | 0.000 | 0.49  | NO | 0.068 | 5.60   |
| 115 | +  | 0.000 | 1.85    | NO | 0.228 | 0.06  | +  | 0.030 | 6.48   |
| 116 | +  | 0.016 | 1.87    | -  | 0.013 | -0.07 | -  | 0.000 | -21.92 |
| 117 | +  | 0.000 | 2.39    | -  | 0.000 | -0.17 | -  | 0.012 | -11.93 |
| 118 | +  | 0.025 | 0.86    | -  | 0.017 | -0.06 | -  | 0.004 | -6.88  |
| 119 | +  | 0.000 | 3.58    | +  | 0.042 | 0.08  | +  | 0.000 | 37.96  |
| 120 | +  | 0.000 | 1.70    | NO | 0.245 | 0.07  | NO | 0.086 | 8.03   |
| 121 | +  | 0.048 | 0.53    | NO | 0.191 | 0.02  | NO | 0.050 | 0.92   |
| 122 | NO | 0.172 | -1.56   | NO | 0.353 | -0.12 | -  | 0.000 | -14.59 |
| 123 | +  | 0.002 | 21.25   | NO | 0.239 | 0.31  | NO | 0.056 | -5.34  |
| 124 | NO | 0.074 | 12.60   | NO | 0.491 | 0.00  | NO | 0.421 | 12.68  |
| 125 | +  | 0.000 | 3.17    | -  | 0.012 | -0.03 | NO | 0.284 | 11.52  |
| 126 | +  | 0.032 | 1.29    | -  | 0.012 | -0.04 | +  | 0.035 | 37.09  |
| 127 | +  | 0.025 | 0.46    | +  | 0.000 | 0.08  | +  | 0.007 | 3.40   |
| 128 | +  | 0.001 | 5.47    | +  | 0.000 | 0.20  | +  | 0.000 | 11.48  |
| 129 | +  | 0.002 | 1.61    | +  | 0.033 | 0.03  | NO | 0.431 | -1.60  |
| 130 | +  | 0.003 | 1.01    | NO | 0.210 | 0.03  | +  | 0.000 | 11.52  |
| 131 | +  | 0.002 | 1.98    | NO | 0.066 | -0.07 | NO | 0.355 | 2.68   |
| 132 | NO | 0.345 | 0.53    | -  | 0.033 | -0.05 | -  | 0.031 | -10.72 |
| 133 | +  | 0.013 | 0.90    | +  | 0.015 | 0.05  | NO | 0.410 | 1.06   |
| 134 | NO | 0.056 | 2.29    | NO | 0.258 | 0.14  | NO | 0.186 | -11.14 |
| 135 | +  | 0.012 | 2.09    | +  | 0.013 | 0.08  | NO | 0.133 | -5.73  |
| 136 | +  | 0.000 | 3.68    | -  | 0.001 | -0.22 | NO | 0.098 | -6.71  |
| 137 | +  | 0.000 | 1.70    | +  | 0.004 | 0.07  | NO | 0.217 | 1.68   |
| 138 | +  | 0.014 | 0.79    | +  | 0.026 | 0.05  | NO | 0.312 | 1.80   |
| 139 | +  | 0.007 | 0.38    | +  | 0.007 | 0.02  | -  | 0.049 | -3.80  |
| 140 | NO | 0.434 | 35.55   | NO | 0.059 | 1.10  | NO | 0.061 | -32.64 |
| 141 | NO | 0.157 | -6.92   | NO | 0.098 | 0.17  | NO | 0.079 | -19.55 |
| 142 | +  | 0.001 | 27.62   | +  | 0.000 | 0.41  | -  | 0.001 | -15.28 |
| 143 | +  | 0.026 | 95.75   | +  | 0.003 | 10.07 | NO | 0.500 | 2.01   |



|     |    |       |         |    |       |       |    |       |        |
|-----|----|-------|---------|----|-------|-------|----|-------|--------|
| 144 | +  | 0.000 | 1036.56 | +  | 0.000 | 33.57 | NO | 0.321 | -0.91  |
| 145 | +  | 0.005 | 14.79   | +  | 0.012 | 0.18  | +  | 0.011 | 5.54   |
| 146 | NO | 0.479 | 0.13    | -  | 0.027 | -0.42 | +  | 0.007 | 14.97  |
| 147 | +  | 0.021 | 17.09   | NO | 0.066 | 0.76  | NO | 0.425 | -0.57  |
| 148 | +  | 0.015 | 100.17  | +  | 0.012 | 1.67  | NO | 0.272 | -1.44  |
| 149 | -  | 0.000 | -27.23  | -  | 0.000 | -0.69 | NO | 0.103 | -2.96  |
| 150 | +  | 0.012 | 11.90   | NO | 0.111 | 0.15  | -  | 0.011 | -10.64 |
| 151 | NO | 0.117 | 9.68    | NO | 0.113 | 0.53  | NO | 0.332 | 0.62   |
| 152 | +  | 0.000 | 25.48   | +  | 0.000 | 1.21  | -  | 0.018 | -12.24 |
| 153 | NO | 0.500 | 0.12    | NO | 0.066 | 0.07  | NO | 0.215 | -0.11  |
| 154 | NO | 0.337 | -58.67  | +  | 0.017 | 0.23  | NO | 0.185 | -5.46  |
| 155 | NO | 0.143 | -10.52  | +  | 0.006 | 0.29  | NO | 0.156 | 5.27   |
| 156 | +  | 0.000 | 11.50   | +  | 0.000 | 0.74  | +  | 0.000 | 36.33  |
| 157 | +  | 0.000 | 1.42    | +  | 0.000 | 0.11  | +  | 0.000 | 12.80  |
| 158 | NO | 0.244 | 0.49    | NO | 0.149 | -0.07 | -  | 0.005 | -3.60  |
| 159 | NO | 0.310 | -0.71   | NO | 0.065 | 0.03  | NO | 0.386 | 0.00   |
| 160 | NO | 0.337 | -0.72   | +  | 0.023 | 0.02  | -  | 0.000 | -6.40  |
| 161 | NO | N/A   | -0.09   | NO | 0.314 | 0.00  | -  | 0.000 | -9.59  |
| 162 | +  | 0.025 | 0.72    | NO | 0.331 | -0.01 | -  | 0.035 | -2.69  |
| 163 | +  | 0.001 | 1.70    | +  | 0.001 | 0.02  | +  | 0.000 | 4.76   |
| 164 | +  | 0.001 | 1.09    | +  | 0.016 | 0.02  | NO | 0.453 | -0.62  |
| 165 | NO | 0.233 | -0.53   | NO | 0.305 | 0.02  | NO | 0.196 | -3.34  |
| 166 | NO | 0.171 | 0.07    | +  | 0.000 | 0.03  | +  | 0.000 | 4.80   |
| 167 | +  | 0.000 | 6.95    | NO | 0.261 | 0.02  | -  | 0.000 | -8.89  |
| 168 | NO | 0.167 | -0.48   | NO | 0.385 | 0.01  | NO | 0.061 | -1.90  |
| 169 | -  | 0.023 | -1.20   | NO | 0.302 | 0.08  | -  | 0.000 | -14.86 |
| 170 | +  | 0.001 | 6.11    | NO | 0.500 | 0.09  | NO | 0.115 | -4.32  |
| 171 | NO | 0.142 | 0.32    | +  | 0.000 | 0.13  | -  | 0.001 | -1.52  |
| 172 | -  | 0.022 | -0.65   | NO | 0.468 | 0.04  | -  | 0.026 | -14.40 |
| 173 | NO | 0.143 | -9.94   | -  | 0.012 | -0.07 | -  | 0.007 | -4.48  |
| 174 | NO | 0.058 | -0.05   | +  | 0.000 | 0.07  | +  | 0.013 | 2.41   |
| 175 | +  | 0.000 | 2.97    | NO | 0.083 | -0.09 | NO | 0.404 | -0.43  |
| 176 | +  | 0.030 | 0.34    | NO | 0.153 | 0.02  | -  | 0.020 | -3.49  |
| 177 | NO | 0.373 | 0.33    | -  | 0.030 | -0.10 | -  | 0.000 | -5.05  |
| 178 | NO | 0.294 | -11.28  | NO | 0.335 | -0.59 | -  | 0.014 | -16.24 |
| 179 | -  | 0.000 | -4.25   | -  | 0.000 | -0.38 | -  | 0.000 | -69.81 |
| 180 | +  | 0.000 | 4.44    | +  | 0.000 | 0.19  | NO | 0.118 | -7.88  |
| 181 | +  | 0.001 | 1.61    | NO | 0.485 | -0.07 | NO | 0.251 | 0.80   |
| 182 | +  | 0.000 | 1.96    | -  | 0.028 | -0.41 | NO | 0.386 | -1.52  |
| 183 | NO | 0.490 | -1.58   | +  | 0.000 | 0.26  | -  | 0.000 | -8.85  |
| 184 | +  | 0.000 | 94.89   | NO | 0.237 | -0.03 | NO | 0.058 | -2.13  |
| 185 | NO | 0.228 | 1.54    | NO | 0.089 | 0.02  | -  | 0.042 | -1.44  |
| 186 | NO | 0.181 | 4.72    | +  | 0.017 | 0.34  | -  | 0.000 | -24.34 |
| 187 | +  | 0.000 | 10.03   | +  | 0.024 | 0.34  | NO | 0.437 | -0.55  |
| 188 | +  | 0.000 | 18.38   | +  | 0.000 | 0.76  | NO | 0.493 | -0.74  |
| 189 | +  | 0.000 | 139.17  | +  | 0.000 | 4.94  | NO | 0.199 | 6.98   |
| 190 | +  | 0.000 | 17.00   | +  | 0.000 | 2.17  | +  | 0.000 | 11.76  |
| 191 | NO | 0.077 | 0.75    | NO | 0.500 | -0.05 | -  | 0.028 | -4.86  |
| 192 | -  | 0.007 | -15.08  | -  | 0.022 | -1.59 | NO | 0.343 | -17.79 |

|     |    |       |       |    |       |       |    |       |        |
|-----|----|-------|-------|----|-------|-------|----|-------|--------|
| 193 | NO | 0.122 | 1.82  | +  | 0.000 | 0.37  | NO | 0.070 | 7.80   |
| 194 | NO | 0.117 | 2.46  | NO | 0.223 | 0.06  | NO | 0.438 | 0.12   |
| 195 | NO | 0.325 | -6.22 | NO | 0.161 | -0.57 | NO | 0.135 | -4.64  |
| 196 | +  | 0.000 | 7.91  | +  | 0.000 | 0.75  | -  | 0.004 | -11.39 |
| 197 | +  | 0.043 | 2.38  | NO | 0.242 | -0.07 | -  | 0.001 | -15.92 |
| 198 | NO | 0.170 | 1.09  | NO | 0.487 | -0.03 | -  | 0.000 | -20.96 |
| 199 | +  | 0.001 | 2.38  | NO | 0.079 | 0.02  | -  | 0.000 | -7.11  |
| 200 | +  | 0.016 | 0.39  | NO | 0.409 | -0.01 | -  | 0.003 | -9.91  |
| 201 | +  | 0.000 | 2.99  | +  | 0.000 | 0.24  | +  | 0.002 | 5.66   |
| 202 | +  | 0.021 | 2.48  | +  | 0.000 | 0.31  | NO | 0.430 | 3.72   |
| 203 | +  | 0.003 | 3.45  | +  | 0.001 | 0.32  | NO | 0.493 | -0.59  |
| 204 | NO | 0.386 | 0.15  | -  | 0.000 | -0.41 | NO | 0.330 | 1.03   |
| 205 | +  | 0.000 | 4.92  | +  | 0.000 | 0.85  | +  | 0.000 | 13.32  |
| 206 | +  | 0.001 | 1.94  | +  | 0.000 | 0.75  | +  | 0.005 | 9.36   |
| 207 | +  | 0.020 | 0.00  | +  | 0.000 | 0.18  | -  | 0.002 | -9.04  |
| 208 | +  | 0.002 | 8.69  | +  | 0.000 | 0.97  | NO | 0.176 | -4.04  |
| 209 | +  | 0.004 | 1.93  | +  | 0.000 | 0.34  | NO | 0.170 | -2.61  |
| 210 | NO | 0.094 | -3.10 | -  | 0.044 | -0.32 | -  | 0.000 | -30.53 |
| 211 | -  | 0.003 | -2.45 | -  | 0.000 | -0.11 | -  | 0.001 | -5.32  |
| 212 | +  | 0.035 | 4.11  | NO | 0.150 | -0.03 | NO | 0.161 | 9.60   |
| 213 | NO | 0.361 | 0.65  | NO | 0.253 | 0.00  | -  | 0.000 | -20.93 |
| 214 | NO | 0.058 | 1.27  | +  | 0.002 | 0.12  | +  | 0.008 | 32.98  |
| 215 | -  | 0.000 | -9.91 | +  | 0.005 | 0.18  | -  | 0.000 | -19.91 |
| 216 | NO | 0.122 | 6.07  | NO | 0.475 | 0.07  | -  | 0.000 | -22.99 |
| 217 | +  | 0.000 | 3.48  | +  | 0.000 | 0.18  | -  | 0.002 | -7.08  |
| 218 | NO | 0.373 | -0.15 | +  | 0.007 | 0.93  | +  | 0.011 | 15.28  |
| 219 | +  | 0.000 | 49.13 | NO | 0.096 | 0.48  | -  | 0.001 | -38.20 |
| 220 | +  | 0.000 | 5.13  | +  | 0.017 | 0.72  | -  | 0.000 | -40.79 |
| 221 | NO | 0.172 | -3.22 | -  | 0.000 | -1.31 | -  | 0.002 | -27.52 |
| 222 | +  | 0.000 | 5.45  | +  | 0.000 | 0.91  | +  | 0.005 | 6.96   |
| 223 | +  | 0.005 | 18.38 | NO | 0.417 | -0.01 | -  | 0.000 | -22.92 |
| 224 | NO | 0.192 | -2.73 | NO | 0.079 | -0.49 | NO | 0.058 | -6.30  |
| 225 | +  | 0.005 | 3.72  | NO | 0.353 | -0.24 | -  | 0.000 | -13.76 |
| 226 | +  | 0.000 | 18.02 | NO | 0.161 | -0.26 | -  | 0.000 | -29.04 |
| 227 | +  | 0.000 | 5.90  | NO | 0.367 | -0.15 | -  | 0.029 | -12.74 |

*Results of the trend analysis for Na, Cl and NO<sub>3</sub>.*

| Monitoring well | Ca          |         |                     | Mg          |         |                     | SO <sub>4</sub> |         |                     |
|-----------------|-------------|---------|---------------------|-------------|---------|---------------------|-----------------|---------|---------------------|
|                 | Test Result | p-value | OLS [mg/L] 21 years | Test Result | p-value | OLS [mg/L] 21 years | Test Result     | p-value | OLS [mg/L] 21 years |
| 1               | -           | 0.007   | -8.63               | -           | 0.000   | -8.87               | -               | 0.000   | -38.62              |
| 2               | NO          | 0.086   | 3.14                | NO          | 0.202   | 0.34                | NO              | 0.400   | -0.75               |
| 3               | +           | 0.007   | 4.08                | NO          | 0.072   | 0.75                | +               | 0.002   | 2.90                |
| 4               | -           | 0.038   | -7.80               | -           | 0.004   | -3.23               | NO              | 0.080   | 2.58                |
| 5               | NO          | 0.200   | -3.70               | -           | 0.003   | -3.43               | -               | 0.000   | -14.06              |
| 6               | NO          | 0.233   | -6.97               | NO          | 0.082   | -2.11               | -               | 0.000   | -8.23               |
| 7               | NO          | 0.054   | 2.05                | NO          | 0.113   | 0.73                | -               | 0.000   | -4.28               |
| 8               | -           | 0.001   | -9.74               | -           | 0.000   | -10.86              | -               | 0.000   | -14.45              |
| 9               | NO          | 0.291   | 7.70                | NO          | 0.233   | 2.52                | NO              | 0.402   | -0.80               |
| 10              | +           | 0.028   | 4.84                | +           | 0.001   | 1.65                | +               | 0.013   | 0.76                |
| 11              | -           | 0.000   | -14.08              | NO          | 0.337   | -0.10               | -               | 0.001   | -6.31               |
| 12              | NO          | 0.155   | -6.34               | -           | 0.012   | -11.62              | -               | 0.008   | -13.94              |
| 13              | -           | 0.028   | -6.24               | NO          | 0.054   | -2.16               | NO              | 0.104   | -9.20               |
| 14              | +           | 0.001   | 7.51                | +           | 0.000   | 3.36                | NO              | 0.182   | -2.52               |
| 15              | +           | 0.004   | 10.83               | NO          | 0.345   | -0.11               | NO              | 0.084   | -0.88               |
| 16              | NO          | 0.064   | -6.45               | -           | 0.005   | -2.65               | -               | 0.000   | -9.91               |
| 17              | +           | 0.003   | 3.92                | -           | 0.022   | -1.29               | -               | 0.000   | -11.93              |
| 18              | +           | 0.000   | 9.18                | +           | 0.000   | 2.32                | NO              | 0.133   | -1.84               |
| 19              | -           | 0.002   | -17.50              | -           | 0.002   | -6.58               | -               | 0.000   | -15.54              |
| 20              | NO          | 0.134   | -0.59               | NO          | 0.483   | 1.38                | -               | 0.000   | -10.00              |
| 21              | NO          | 0.109   | 3.59                | NO          | 0.301   | -0.59               | -               | 0.000   | -14.41              |
| 22              | NO          | 0.117   | 2.18                | +           | 0.015   | 1.63                | -               | 0.000   | -9.48               |
| 23              | NO          | 0.086   | 22.93               | -           | 0.000   | -21.28              | -               | 0.000   | -46.48              |
| 24              | NO          | 0.118   | 2.21                | NO          | 0.086   | -1.62               | -               | 0.000   | -13.60              |
| 25              | NO          | 0.376   | 0.28                | -           | 0.009   | -1.20               | -               | 0.000   | -5.92               |
| 26              | +           | 0.048   | 1.90                | NO          | 0.259   | -0.53               | -               | 0.000   | -6.60               |
| 27              | +           | 0.050   | 7.21                | NO          | 0.066   | -1.32               | -               | 0.000   | -14.86              |
| 28              | +           | 0.020   | 17.20               | NO          | 0.124   | 1.58                | -               | 0.016   | -10.79              |
| 29              | NO          | 0.361   | 0.08                | -           | 0.017   | -1.86               | -               | 0.000   | -17.78              |
| 30              | NO          | 0.130   | 1.74                | NO          | 0.114   | 0.87                | -               | 0.001   | -8.98               |
| 31              | NO          | 0.320   | -9.40               | +           | 0.043   | 2.18                | -               | 0.000   | -17.28              |
| 32              | +           | 0.000   | 12.04               | NO          | 0.121   | 0.78                | -               | 0.014   | -5.04               |
| 33              | NO          | 0.192   | -1.68               | -           | 0.030   | -6.94               | -               | 0.000   | -24.58              |
| 34              | +           | 0.035   | 5.61                | NO          | 0.336   | -2.07               | NO              | 0.216   | 0.12                |
| 35              | +           | 0.039   | 2.89                | +           | 0.018   | 0.39                | NO              | 0.184   | 0.29                |
| 36              | +           | 0.038   | 8.74                | NO          | 0.166   | 1.09                | -               | 0.001   | -12.18              |
| 37              | -           | 0.003   | -18.26              | -           | 0.003   | -6.58               | -               | 0.000   | -13.64              |
| 38              | NO          | 0.053   | 5.48                | NO          | 0.240   | 0.30                | -               | 0.010   | -2.23               |
| 39              | NO          | 0.331   | 0.89                | NO          | 0.143   | 0.35                | -               | 0.000   | -6.17               |
| 40              | NO          | 0.113   | -20.84              | -           | 0.000   | -7.21               | -               | 0.000   | -39.34              |
| 41              | +           | 0.001   | 14.57               | +           | 0.017   | 6.89                | -               | 0.045   | -7.68               |
| 42              | NO          | 0.429   | 0.14                | -           | 0.003   | -5.68               | -               | 0.003   | -14.89              |
| 43              | -           | 0.024   | -23.84              | -           | 0.000   | -8.32               | -               | 0.000   | -34.06              |
| 44              | NO          | 0.207   | -0.73               | -           | 0.002   | -3.88               | -               | 0.000   | -25.50              |

|    |    |       |        |    |       |        |    |       |        |
|----|----|-------|--------|----|-------|--------|----|-------|--------|
| 45 | +  | 0.000 | 6.10   | NO | 0.137 | 0.65   | -  | 0.000 | -4.80  |
| 46 | NO | 0.148 | 0.49   | NO | 0.220 | 1.08   | -  | 0.000 | -5.00  |
| 47 | +  | 0.000 | 21.39  | +  | 0.000 | 6.52   | +  | 0.000 | 20.71  |
| 48 | NO | 0.126 | -8.04  | -  | 0.033 | -2.10  | -  | 0.000 | -14.04 |
| 49 | +  | 0.004 | 13.48  | NO | 0.312 | -0.73  | -  | 0.049 | -1.34  |
| 50 | +  | 0.001 | 21.00  | +  | 0.000 | 1.73   | NO | 0.233 | 0.11   |
| 51 | NO | 0.102 | -56.05 | -  | 0.046 | -16.44 | -  | 0.038 | -75.24 |
| 52 | +  | 0.000 | 5.06   | NO | 0.067 | 0.94   | -  | 0.018 | -2.30  |
| 53 | NO | 0.500 | 0.28   | NO | 0.255 | -0.30  | -  | 0.000 | -4.18  |
| 54 | -  | 0.006 | -8.40  | NO | 0.163 | -1.18  | -  | 0.000 | -15.79 |
| 55 | -  | 0.024 | -3.06  | -  | 0.018 | -1.43  | -  | 0.000 | -18.06 |
| 56 | NO | 0.064 | 1.27   | NO | 0.121 | -10.43 | -  | 0.001 | -7.81  |
| 57 | -  | 0.029 | -5.26  | -  | 0.002 | -2.22  | -  | 0.000 | -20.52 |
| 58 | NO | 0.173 | -0.68  | NO | 0.073 | 1.40   | NO | 0.076 | -2.22  |
| 59 | NO | 0.214 | 9.22   | +  | 0.011 | 6.21   | -  | 0.001 | -30.01 |
| 60 | +  | 0.005 | 6.05   | NO | 0.077 | 0.79   | -  | 0.000 | -10.30 |
| 61 | NO | 0.112 | 4.90   | +  | 0.006 | 1.10   | NO | 0.220 | -2.11  |
| 62 | NO | 0.224 | -29.75 | NO | 0.500 | -3.35  | NO | 0.062 | -3.68  |
| 63 | -  | 0.038 | -7.80  | -  | 0.003 | -5.98  | -  | 0.000 | -15.20 |
| 64 | +  | 0.000 | 25.09  | NO | 0.139 | -0.99  | -  | 0.000 | -28.48 |
| 65 | NO | 0.082 | -14.12 | NO | 0.079 | -6.14  | -  | 0.008 | -14.24 |
| 66 | NO | 0.306 | -3.25  | NO | 0.283 | -2.34  | -  | 0.045 | -10.68 |
| 67 | NO | 0.083 | 2.51   | +  | 0.000 | 4.93   | NO | 0.406 | -1.67  |
| 68 | +  | 0.000 | 58.16  | +  | 0.000 | 8.06   | +  | 0.000 | 65.28  |
| 69 | +  | 0.000 | 11.30  | +  | 0.021 | 0.98   | -  | 0.009 | -5.25  |
| 70 | NO | 0.130 | 7.87   | +  | 0.010 | 2.46   | NO | 0.124 | -0.95  |
| 71 | +  | 0.050 | 4.23   | NO | 0.220 | -0.50  | -  | 0.000 | -29.24 |
| 72 | +  | 0.000 | 7.93   | +  | 0.000 | 5.30   | -  | 0.005 | -1.60  |
| 73 | NO | 0.297 | 1.85   | NO | 0.361 | 0.67   | NO | 0.104 | -19.11 |
| 74 | -  | 0.024 | -17.95 | -  | 0.008 | -3.85  | -  | 0.000 | -14.92 |
| 75 | +  | 0.002 | 5.42   | +  | 0.002 | 0.91   | -  | 0.001 | -4.40  |
| 76 | NO | 0.196 | 2.57   | -  | 0.016 | -2.98  | -  | 0.000 | -16.40 |
| 77 | NO | 0.064 | -31.85 | NO | 0.435 | -0.45  | -  | 0.042 | -75.93 |
| 78 | -  | 0.008 | -35.49 | NO | 0.314 | -0.44  | -  | 0.000 | -33.43 |
| 79 | NO | 0.059 | -23.05 | NO | 0.220 | -1.45  | -  | 0.000 | -34.60 |
| 80 | NO | 0.267 | 1.30   | +  | 0.002 | 3.77   | NO | 0.312 | 1.04   |
| 81 | +  | 0.028 | 4.67   | NO | N/A   | 1.08   | NO | 0.171 | -0.14  |
| 82 | -  | 0.025 | -12.25 | -  | 0.000 | -4.90  | -  | 0.034 | -12.05 |
| 83 | +  | 0.002 | 7.67   | NO | 0.162 | -0.26  | +  | 0.002 | 4.83   |
| 84 | NO | 0.062 | 25.20  | +  | 0.016 | 4.96   | +  | 0.000 | 47.16  |
| 85 | NO | 0.145 | -4.24  | -  | 0.034 | -3.41  | -  | 0.045 | -24.11 |
| 86 | NO | 0.330 | 4.99   | NO | 0.195 | -0.78  | NO | 0.298 | -1.09  |
| 87 | NO | 0.076 | 4.26   | NO | 0.456 | 0.10   | NO | 0.478 | 1.51   |
| 88 | +  | 0.026 | 6.50   | NO | 0.444 | -0.80  | NO | 0.199 | 0.50   |
| 89 | NO | 0.089 | -18.23 | -  | 0.003 | -2.03  | NO | 0.090 | -12.47 |
| 90 | NO | 0.228 | 8.71   | +  | 0.022 | 2.16   | -  | 0.006 | -9.92  |
| 91 | -  | 0.013 | -62.43 | -  | 0.035 | -8.61  | NO | 0.156 | -20.91 |
| 92 | NO | 0.108 | -7.02  | NO | 0.149 | 0.21   | NO | 0.227 | -3.28  |
| 93 | NO | 0.288 | -5.58  | NO | 0.087 | -1.15  | -  | 0.005 | -12.18 |

|     |    |       |        |    |       |        |    |       |        |
|-----|----|-------|--------|----|-------|--------|----|-------|--------|
| 94  | NO | 0.303 | -6.80  | NO | 0.261 | -0.43  | -  | 0.008 | -4.12  |
| 95  | NO | 0.108 | 16.30  | +  | 0.033 | 2.05   | NO | 0.301 | 1.85   |
| 96  | +  | 0.007 | 14.51  | +  | 0.019 | 1.85   | NO | 0.170 | 2.65   |
| 97  | NO | 0.295 | -1.25  | NO | 0.107 | -0.53  | -  | 0.000 | -5.49  |
| 98  | +  | 0.032 | 8.68   | NO | 0.232 | -1.09  | -  | 0.000 | -22.24 |
| 99  | NO | 0.108 | -8.29  | NO | 0.188 | 0.10   | -  | 0.000 | -8.90  |
| 100 | +  | 0.009 | 44.00  | +  | 0.000 | 8.70   | -  | 0.000 | -4.37  |
| 101 | NO | 0.463 | -1.63  | +  | 0.034 | 1.08   | -  | 0.002 | -7.14  |
| 102 | NO | 0.093 | 5.72   | +  | 0.034 | 0.88   | NO | 0.088 | 1.60   |
| 103 | NO | 0.413 | -2.00  | NO | 0.320 | -0.10  | NO | 0.181 | -1.39  |
| 104 | NO | 0.095 | 5.38   | +  | 0.007 | 2.68   | -  | 0.000 | -7.01  |
| 105 | -  | 0.012 | -12.93 | -  | 0.003 | -3.20  | -  | 0.000 | -13.00 |
| 106 | NO | 0.201 | -7.64  | -  | 0.019 | -0.91  | NO | 0.142 | -3.91  |
| 107 | +  | 0.039 | 11.59  | +  | 0.001 | 9.86   | NO | 0.394 | 0.39   |
| 108 | NO | 0.453 | -9.66  | NO | 0.052 | -2.16  | -  | 0.013 | -11.81 |
| 109 | NO | 0.054 | 7.20   | NO | 0.066 | 2.21   | NO | 0.364 | -0.71  |
| 110 | -  | 0.011 | -41.08 | -  | 0.042 | -4.43  | -  | 0.000 | -33.73 |
| 111 | NO | 0.169 | -14.43 | NO | 0.408 | 0.85   | -  | 0.000 | -39.28 |
| 112 | -  | 0.035 | -6.50  | -  | 0.002 | -2.24  | -  | 0.000 | -7.77  |
| 113 | -  | 0.000 | -12.04 | -  | 0.006 | -2.94  | -  | 0.000 | -19.23 |
| 114 | NO | 0.125 | -9.02  | +  | 0.041 | 1.72   | NO | 0.435 | 5.54   |
| 115 | +  | 0.022 | 13.83  | +  | 0.000 | 5.03   | -  | 0.013 | -14.11 |
| 116 | -  | 0.014 | -8.03  | -  | 0.004 | -15.18 | -  | 0.001 | -4.99  |
| 117 | NO | 0.131 | -4.88  | NO | 0.053 | -2.18  | -  | 0.001 | -10.58 |
| 118 | NO | 0.346 | -2.26  | NO | 0.081 | -1.38  | -  | 0.000 | -14.36 |
| 119 | +  | 0.019 | 12.66  | +  | 0.005 | 2.13   | -  | 0.000 | -13.44 |
| 120 | NO | 0.444 | 0.85   | NO | 0.293 | 0.70   | -  | 0.008 | -5.04  |
| 121 | -  | 0.021 | -11.36 | NO | 0.093 | -3.85  | -  | 0.000 | -33.43 |
| 122 | -  | 0.004 | -5.62  | NO | 0.251 | -1.97  | -  | 0.000 | -10.12 |
| 123 | -  | 0.003 | -9.13  | -  | 0.003 | -4.18  | -  | 0.000 | -12.01 |
| 124 | NO | 0.194 | -31.35 | NO | 0.227 | 2.10   | NO | 0.446 | -32.68 |
| 125 | NO | 0.370 | 6.53   | NO | 0.275 | 0.62   | -  | 0.020 | -6.13  |
| 126 | NO | 0.500 | 0.20   | NO | 0.166 | -0.10  | -  | 0.003 | -6.19  |
| 127 | NO | 0.491 | -2.76  | NO | 0.240 | -1.46  | -  | 0.007 | -5.04  |
| 128 | +  | 0.021 | 8.03   | NO | 0.117 | 0.05   | -  | 0.017 | -5.59  |
| 129 | NO | 0.096 | -12.22 | NO | 0.108 | -1.85  | -  | 0.000 | -15.41 |
| 130 | NO | 0.389 | 0.50   | +  | 0.018 | 1.88   | -  | 0.000 | -12.05 |
| 131 | NO | 0.271 | -5.48  | NO | 0.354 | 0.40   | -  | 0.002 | -13.36 |
| 132 | -  | 0.007 | -20.75 | NO | 0.444 | -0.57  | -  | 0.000 | -20.75 |
| 133 | NO | 0.154 | 1.27   | +  | 0.006 | 1.87   | NO | 0.444 | 0.40   |
| 134 | NO | 0.376 | -14.31 | NO | 0.051 | -13.30 | -  | 0.000 | -48.52 |
| 135 | NO | 0.470 | 0.26   | NO | 0.327 | -5.62  | NO | 0.091 | -4.51  |
| 136 | NO | 0.187 | -3.90  | NO | 0.206 | 0.20   | -  | 0.000 | -14.15 |
| 137 | NO | 0.226 | -6.55  | NO | 0.283 | -0.75  | -  | 0.000 | -9.20  |
| 138 | NO | 0.247 | -3.46  | NO | 0.283 | -1.82  | -  | 0.006 | -5.63  |
| 139 | NO | 0.207 | -2.76  | NO | 0.207 | -1.04  | -  | 0.002 | -7.81  |
| 140 | NO | 0.316 | -1.94  | -  | 0.036 | -3.83  | -  | 0.000 | -54.77 |
| 141 | NO | 0.077 | -29.37 | -  | 0.006 | -8.71  | -  | 0.000 | -      |
| 142 | +  | 0.044 | 25.15  | +  | 0.002 | 7.88   | +  | 0.000 | 69.66  |

|     |    |       |        |    |       |        |    |       |        |
|-----|----|-------|--------|----|-------|--------|----|-------|--------|
| 143 | +  | 0.005 | 78.26  | NO | 0.161 | 4.58   | -  | 0.024 | -52.11 |
| 144 | NO | 0.408 | 17.10  | NO | 0.108 | 12.05  | NO | N/A   | -11.68 |
| 145 | +  | 0.042 | 12.05  | +  | 0.001 | 13.80  | +  | 0.000 | 64.58  |
| 146 | -  | 0.000 | -      | -  | 0.000 | -14.54 | -  | 0.000 | -      |
| 147 | NO | 0.184 | 112.93 | NO | 0.366 | 1.66   | NO | 0.075 | 205.08 |
| 148 | NO | 0.336 | 38.36  | NO | 0.169 | 13.07  | NO | 0.353 | -13.61 |
| 149 | -  | 0.007 | 28.45  | -  | 0.000 | -13.23 | -  | 0.000 | 51.72  |
| 150 | NO | 0.439 | -42.65 | NO | 0.474 | 0.39   | NO | 0.240 | -      |
| 151 | -  | 0.024 | 0.78   | -  | 0.005 | -10.28 | -  | 0.000 | 146.70 |
| 152 | NO | 0.059 | -30.23 | -  | 0.001 | -11.28 | -  | 0.000 | -      |
| 153 | +  | 0.049 | -30.53 | NO | 0.346 | -2.13  | NO | 0.458 | 180.36 |
| 154 | NO | 0.071 | 11.03  | NO | 0.146 | 9.28   | NO | 0.140 | 1.80   |
| 155 | +  | 0.002 | 64.45  | NO | 0.149 | 5.30   | NO | 0.304 | 15.13  |
| 156 | +  | 0.000 | 73.22  | +  | 0.000 | 2.57   | +  | 0.000 | -14.28 |
| 157 | +  | 0.000 | 48.47  | +  | 0.000 | 2.68   | +  | 0.000 | 41.12  |
| 158 | +  | 0.004 | 8.22   | NO | 0.263 | 0.50   | NO | 0.267 | 4.26   |
| 159 | NO | 0.059 | 16.69  | +  | 0.036 | 1.75   | -  | 0.000 | 3.26   |
| 160 | NO | 0.247 | 6.53   | -  | 0.029 | -0.83  | -  | 0.000 | -7.56  |
| 161 | -  | 0.024 | -1.01  | -  | 0.013 | -1.28  | -  | 0.000 | -7.91  |
| 162 | NO | 0.089 | -2.18  | NO | 0.167 | 0.18   | -  | 0.003 | -6.31  |
| 163 | +  | 0.000 | 1.17   | +  | 0.023 | 0.65   | NO | 0.087 | -2.05  |
| 164 | +  | 0.002 | 3.13   | NO | 0.097 | 0.03   | -  | 0.011 | 0.29   |
| 165 | NO | 0.192 | 4.68   | NO | 0.185 | -1.37  | -  | 0.000 | -4.75  |
| 166 | +  | 0.003 | 2.90   | +  | 0.003 | 1.55   | +  | 0.000 | -12.56 |
| 167 | +  | 0.040 | 5.30   | +  | 0.001 | 1.58   | +  | 0.000 | 4.52   |
| 168 | NO | 0.174 | 6.00   | NO | 0.106 | -0.25  | -  | 0.001 | 13.60  |
| 169 | NO | 0.103 | -0.20  | NO | 0.111 | -1.75  | -  | 0.002 | -2.04  |
| 170 | NO | 0.166 | -4.48  | NO | 0.304 | -0.39  | -  | 0.001 | -12.40 |
| 171 | NO | 0.087 | 3.70   | NO | 0.347 | 0.57   | -  | 0.000 | -4.45  |
| 172 | -  | 0.039 | 2.02   | -  | 0.000 | -3.19  | -  | 0.000 | -3.81  |
| 173 | -  | 0.034 | -3.53  | NO | 0.110 | -1.23  | -  | 0.000 | -18.70 |
| 174 | +  | 0.001 | -5.80  | +  | 0.000 | 0.05   | +  | 0.000 | -14.66 |
| 175 | NO | 0.416 | 3.45   | -  | 0.048 | -0.53  | NO | 0.368 | 1.98   |
| 176 | +  | 0.009 | -0.13  | NO | 0.346 | -0.11  | -  | 0.000 | -0.24  |
| 177 | NO | 0.079 | 4.90   | NO | 0.050 | 1.30   | +  | 0.043 | -12.48 |
| 178 | NO | 0.259 | 3.48   | -  | 0.038 | -24.35 | -  | 0.001 | 2.24   |
| 179 | -  | 0.000 | -60.83 | -  | 0.000 | -6.53  | -  | 0.000 | -73.22 |
| 180 | +  | 0.046 | -24.26 | +  | 0.001 | 2.85   | -  | 0.000 | -28.58 |
| 181 | NO | 0.143 | 16.80  | -  | 0.013 | -2.45  | -  | 0.018 | -10.25 |
| 182 | -  | 0.002 | -4.58  | -  | 0.001 | -9.72  | -  | 0.000 | -22.72 |
| 183 | NO | 0.345 | -49.46 | NO | 0.127 | 2.04   | -  | 0.000 | -56.12 |
| 184 | -  | 0.025 | 8.18   | NO | 0.090 | -6.86  | -  | 0.014 | -15.84 |
| 185 | +  | 0.001 | -54.14 | +  | 0.011 | 2.11   | -  | 0.004 | -9.44  |
| 186 | -  | 0.034 | 22.94  | -  | 0.011 | -2.35  | -  | 0.000 | -5.48  |
| 187 | NO | 0.354 | -12.33 | NO | 0.435 | 1.95   | NO | 0.164 | -40.51 |
| 188 | NO | 0.163 | 12.65  | +  | 0.042 | 1.48   | NO | 0.407 | -1.23  |
| 189 | +  | 0.024 | 7.03   | NO | 0.095 | 23.90  | NO | 0.135 | -2.91  |
| 190 | +  | 0.000 | 31.50  | +  | 0.000 | 19.86  | +  | 0.002 | -5.37  |
|     |    |       | 21.71  |    |       |        |    |       | 7.01   |

|     |    |       |        |    |       |        |    |       |        |
|-----|----|-------|--------|----|-------|--------|----|-------|--------|
| 191 | NO | 0.337 | 1.63   | NO | 0.062 | -5.62  | -  | 0.000 | -6.96  |
| 192 | NO | 0.080 | -9.72  | NO | 0.147 | -9.41  | -  | 0.000 | -66.81 |
| 193 | NO | 0.186 | 3.67   | +  | 0.021 | 3.77   | -  | 0.000 | -19.80 |
| 194 | NO | 0.186 | 8.54   | +  | 0.037 | 2.30   | NO | 0.500 | -3.64  |
| 195 | NO | 0.138 | 6.30   | NO | 0.080 | 1.43   | NO | 0.124 | -15.57 |
| 196 | +  | 0.006 | 12.48  | +  | 0.003 | 6.63   | NO | 0.102 | 0.78   |
| 197 | NO | 0.067 | 10.35  | NO | 0.447 | -2.57  | -  | 0.001 | -24.28 |
| 198 | -  | 0.012 | -18.03 | -  | 0.001 | -4.14  | -  | 0.048 | -9.49  |
| 199 | NO | 0.441 | 0.34   | NO | 0.131 | 0.79   | NO | 0.408 | -1.20  |
| 200 | NO | 0.337 | -4.45  | NO | 0.435 | -2.23  | -  | 0.002 | -8.49  |
| 201 | +  | 0.011 | 26.53  | +  | 0.010 | 3.30   | -  | 0.011 | -3.12  |
| 202 | +  | 0.040 | 16.83  | +  | 0.003 | 7.55   | -  | 0.006 | -4.26  |
| 203 | NO | 0.094 | -21.92 | -  | 0.050 | -3.67  | -  | 0.000 | -29.54 |
| 204 | NO | 0.107 | -11.43 | NO | 0.230 | -5.08  | -  | 0.000 | -59.60 |
| 205 | +  | 0.009 | 25.84  | +  | 0.000 | 5.38   | -  | 0.001 | -10.29 |
| 206 | +  | 0.003 | 31.77  | +  | 0.000 | 4.71   | -  | 0.009 | -4.83  |
| 207 | NO | 0.261 | 7.20   | NO | 0.112 | 0.65   | -  | 0.000 | -18.19 |
| 208 | +  | 0.041 | 20.72  | +  | 0.044 | 1.79   | -  | 0.000 | -14.83 |
| 209 | NO | 0.463 | 0.33   | NO | 0.320 | -2.20  | -  | 0.000 | -19.31 |
| 210 | NO | 0.393 | -7.24  | -  | 0.040 | -6.35  | -  | 0.003 | -39.68 |
| 211 | NO | 0.193 | -3.46  | -  | 0.004 | -2.04  | -  | 0.000 | -14.52 |
| 212 | NO | 0.073 | 11.73  | NO | 0.254 | 0.96   | NO | 0.144 | -8.32  |
| 213 | NO | 0.445 | -1.96  | NO | 0.251 | 0.14   | -  | 0.000 | -20.40 |
| 214 | NO | 0.163 | 14.13  | +  | 0.040 | 2.70   | -  | 0.000 | -13.74 |
| 215 | NO | 0.491 | 1.80   | +  | 0.003 | 1.73   | -  | 0.000 | -14.10 |
| 216 | NO | 0.228 | -6.79  | NO | 0.220 | -3.46  | -  | 0.003 | -8.54  |
| 217 | +  | 0.000 | 12.43  | NO | 0.491 | -2.50  | -  | 0.000 | -9.03  |
| 218 | +  | 0.001 | 57.58  | +  | 0.003 | 23.69  | +  | 0.000 | 46.76  |
| 219 | -  | 0.000 | -56.76 | -  | 0.000 | -17.91 | -  | 0.000 | -84.46 |
| 220 | NO | 0.408 | 3.63   | NO | 0.056 | -2.45  | -  | 0.000 | -6.36  |
| 221 | NO | 0.298 | -5.62  | NO | 0.059 | -7.25  | -  | 0.006 | -23.27 |
| 222 | +  | 0.005 | 20.77  | +  | 0.000 | 5.23   | NO | 0.088 | 0.17   |
| 223 | NO | 0.177 | -10.74 | NO | 0.261 | -0.18  | -  | 0.000 | -10.71 |
| 224 | NO | 0.492 | -1.65  | NO | 0.152 | -0.08  | -  | 0.002 | -23.46 |
| 225 | +  | 0.034 | 39.23  | +  | 0.008 | 14.00  | NO | 0.072 | -9.56  |
| 226 | -  | 0.012 | -39.00 | NO | 0.053 | -2.18  | -  | 0.031 | -5.75  |
| 227 | NO | 0.214 | 3.58   | NO | 0.232 | 0.48   | -  | 0.003 | -8.36  |

*Results of the trend analysis for Ca, Mg and SO<sub>4</sub>.*

**Table S2.** Pettitt change point test results (I: first sampling campaign (spring); II: second sampling campaign (autumn)).

| ID | EC         |             |             | SO <sub>4</sub> |             |             | Cl         |             |             | NO <sub>3</sub> |             |             |
|----|------------|-------------|-------------|-----------------|-------------|-------------|------------|-------------|-------------|-----------------|-------------|-------------|
|    | U<br>(t,T) | p-<br>value | ChP<br>date | U<br>(t,T)      | p-<br>value | ChP<br>date | U<br>(t,T) | p-<br>value | ChP<br>date | U<br>(t,T)      | p-<br>value | ChP<br>date |
| 1  | 309        | 0.000       | 2011 II     | 412             | 0.000       | 2011 II     |            | 0.135       |             | 263             | 0.004       | 2016 I      |
| 2  | 139        | 0.032       | 2012 II     |                 | 0.454       |             | 189        | 0.002       | 2012 II     | 289             | 0.000       | 2012 I      |
| 3  |            | 0.099       |             | 235             | 0.013       | 2007 I      |            | 0.298       |             | 205             | 0.036       | 2007 I      |
| 4  | 188        | 0.039       | 2003 I      |                 | 0.056       |             | 316        | 0.000       | 2006 I      | 268             | 0.003       | 2005 II     |
| 5  | 281        | 0.001       | 2011 I      | 261             | 0.005       | 2012 I      | 304        | 0.000       | 2011 I      | 312             | 0.000       | 2011 I      |
| 6  |            | 0.154       |             | 363             | 0.000       | 2008 I      |            | 0.073       |             | 216             | 0.025       | 2009 I      |
| 7  | 206        | 0.001       | 2009 II     | 258             | 0.000       | 2010 I      | 185        | 0.002       | 2010 I      | 211             | 0.001       | 2015 I      |
| 8  | 241        | 0.000       | 2011 I      | 278             | 0.000       | 2011 II     | 234        | 0.000       | 2011 II     | 286             | 0.000       | 2011 II     |
| 9  |            | 0.712       |             |                 | 0.377       |             |            | 0.590       |             |                 | 0.603       |             |
| 10 |            | 0.062       |             | 163             | 0.019       | 2015 II     | 220        | 0.000       | 2011 II     | 187             | 0.006       | 2013 II     |
| 11 | 233        | 0.007       | 2008 II     | 326             | 0.000       | 2011 II     |            | 0.091       |             |                 | 0.291       |             |
| 12 | 319        | 0.000       | 2008 I      | 383             | 0.000       | 2008 I      | 315        | 0.000       | 2008 I      | 398             | 0.000       | 2008 I      |
| 13 | 209        | 0.018       | 2008 II     |                 | 0.079       |             | 329        | 0.000       | 2007 I      | 239             | 0.011       | 2013 I      |
| 14 | 318        | 0.000       | 2011 II     | 224             | 0.019       | 2008 I      | 359        | 0.000       | 2010 I      |                 | 0.179       |             |
| 15 | 177        | 0.004       | 2009 II     | 185             | 0.006       | 2010 I      |            | 0.261       |             | 225             | 0.001       | 2010 II     |
| 16 | 250        | 0.003       | 2005 II     | 419             | 0.000       | 2011 II     | 295        | 0.000       | 2010 II     | 311             | 0.000       | 2010 II     |
| 17 |            | 0.055       |             | 288             | 0.000       | 2011 II     | 147        | 0.022       | 2014 I      | 182             | 0.007       | 2010 II     |
| 18 |            | 0.419       |             | 190             | 0.005       | 2010 I      | 172        | 0.005       | 2009 I      |                 | 0.110       |             |
| 19 |            | 0.372       |             | 411             | 0.000       | 2009 I      | 256        | 0.002       | 2013 I      |                 | 0.086       |             |
| 20 | 188        | 0.039       | 2010 II     | 350             | 0.000       | 2011 II     | 183        | 0.047       | 2009 II     | 273             | 0.003       | 2008 I      |
| 21 | 185        | 0.044       | 2008 II     | 377             | 0.000       | 2009 II     | 275        | 0.001       | 2009 II     |                 | 0.093       |             |
| 22 |            | 0.051       |             | 399             | 0.000       | 2010 I      | 276        | 0.000       | 2010 I      |                 | 0.180       |             |
| 23 |            | 0.100       |             | 231             | 0.000       | 2012 I      | 241        | 0.000       | 2013 I      | 167             | 0.016       | 2009 II     |
| 24 | 151        | 0.017       | 2015 I      | 281             | 0.000       | 2011 I      |            | 0.286       |             | 176             | 0.010       | 2015 I      |
| 25 | 144        | 0.025       | 2009 I      | 263             | 0.000       | 2012 I      |            | 0.312       |             |                 | 0.343       |             |
| 26 | 207        | 0.020       | 2005 II     | 375             | 0.000       | 2004 II     | 259        | 0.002       | 2008 I      | 389             | 0.000       | 2008 I      |
| 27 |            | 0.131       |             | 278             | 0.000       | 2011 II     | 167        | 0.007       | 2007 II     |                 | 0.360       |             |
| 28 | 171        | 0.026       | 2012 I      | 174             | 0.040       | 2010 I      | 163        | 0.036       | 2014 I      |                 | 0.276       |             |
| 29 |            | 0.074       |             | 271             | 0.000       | 2011 II     |            | 0.245       |             | 240             | 0.000       | 2009 I      |
| 30 |            | 0.303       |             | 248             | 0.000       | 2011 II     | 176        | 0.004       | 2008 I      | 157             | 0.026       | 2015 II     |
| 31 |            | 0.124       |             | 357             | 0.000       | 2010 I      |            | 0.639       |             | 295             | 0.001       | 2007 I      |
| 32 |            | 0.446       |             | 261             | 0.005       | 2009 II     | 192        | 0.034       |             | 258             | 0.005       | 2006 I      |
| 33 |            | 0.092       |             | 224             | 0.001       | 2012 II     |            | 0.074       |             |                 | 0.078       |             |
| 34 | 212        | 0.016       | 2011 II     |                 | 0.252       |             | 284        | 0.001       | 2012 II     | 208             | 0.033       | 2011 II     |
| 35 |            | 0.461       |             |                 | 0.113       |             |            | 0.516       |             |                 | 0.139       |             |
| 36 | 159        | 0.011       | 2013 II     | 239             | 0.000       | 2012 II     | 177        | 0.004       | 2014 I      | 176             | 0.010       | 2011 II     |
| 37 |            | 0.205       |             | 293             | 0.000       | 2007 I      | 231        | 0.003       | 2010 I      | 217             | 0.013       | 2015 II     |
| 38 |            | 0.223       |             | 328             | 0.000       | 2010 I      | 205        | 0.021       | 2006 I      | 219             | 0.023       | 2009 II     |
| 39 | 221        | 0.011       | 2012 I      | 399             | 0.000       | 2010 I      | 287        | 0.001       | 2012 I      | 321             | 0.000       | 2009 I      |
| 40 |            | 0.178       |             | 238             | 0.000       | 2013 I      |            | 0.060       |             |                 | 0.319       |             |
| 41 |            | 0.239       |             |                 | 0.068       |             |            | 0.414       |             |                 | 0.200       |             |
| 42 |            | 0.062       |             | 202             | 0.002       | 2009 II     | 147        | 0.022       | 2015 I      |                 | 0.434       |             |



|    |     |       |         |     |       |         |     |       |         |     |       |         |
|----|-----|-------|---------|-----|-------|---------|-----|-------|---------|-----|-------|---------|
| 43 | 255 | 0.003 | 2009 II | 400 | 0.000 | 2010 II | 399 | 0.000 | 2009 I  | 420 | 0.000 | 2010 II |
| 44 | 258 | 0.002 | 2009 I  | 414 | 0.000 | 2009 II | 355 | 0.000 | 2009 I  | 410 | 0.000 | 2009 I  |
| 45 | 273 | 0.001 | 2009 II | 367 | 0.000 | 2009 II | 214 | 0.015 | 2008 II | 404 | 0.000 | 2009 I  |
| 46 |     | 0.194 |         | 330 | 0.000 | 2011 II | 195 | 0.031 | 2008 I  |     | 0.096 |         |
| 47 | 142 | 0.028 | 2015 II | 194 | 0.004 | 2016 II | 233 | 0.000 | 2012 II |     | 0.760 |         |
| 48 | 202 | 0.001 | 2011 II | 249 | 0.000 | 2013 I  | 203 | 0.001 | 2011 I  | 182 | 0.007 | 2012 I  |
| 49 |     | 0.175 |         |     | 0.131 |         | 189 | 0.001 | 2010 I  | 200 | 0.003 | 2013 I  |
| 50 |     | 0.131 |         |     | 0.198 |         | 280 | 0.001 | 2011 II |     | 0.242 |         |
| 51 | 142 | 0.028 | 2009 II | 178 | 0.009 | 2009 II |     | 0.100 |         |     | 0.172 |         |
| 52 |     | 0.158 |         | 301 | 0.000 | 2009 II | 230 | 0.004 | 2011 I  | 235 | 0.006 | 2013 II |
| 53 | 277 | 0.001 | 2011 I  | 388 | 0.000 | 2009 II | 184 | 0.045 | 2012 I  | 205 | 0.036 | 2011 I  |
| 54 |     | 0.203 |         | 440 | 0.000 | 2010 II | 224 | 0.010 | 2014 I  |     | 0.065 |         |
| 55 |     | 0.073 |         | 349 | 0.000 | 2010 II | 256 | 0.001 | 2013 II |     | 0.262 |         |
| 56 |     | 0.108 |         | 279 | 0.002 | 2004 II | 234 | 0.007 | 2008 II |     | 0.001 |         |
| 57 | 233 | 0.007 | 2009 I  | 343 | 0.000 | 2011 I  |     | 0.262 |         | 202 | 0.040 | 2009 II |
| 58 |     | 0.639 |         | 256 | 0.006 | 2009 II |     | 0.128 |         | 202 | 0.040 | 2003 II |
| 59 |     | 0.302 |         | 317 | 0.000 | 2010 I  | 258 | 0.001 | 2006 II | 243 | 0.005 | 2012 I  |
| 60 |     | 0.135 |         | 350 | 0.000 | 2009 II |     | 0.124 |         |     | 0.285 |         |
| 61 |     |       |         | 202 | 0.024 | 2009 II | 316 | 0.000 | 2009 I  | 284 | 0.001 | 2009 II |
| 62 |     | 0.679 |         |     | 0.217 |         |     | 0.393 |         |     | 0.588 |         |
| 63 | 223 | 0.011 | 2011 II | 273 | 0.003 | 2009 II | 264 | 0.002 | 2012 II | 236 | 0.012 | 2011 I  |
| 64 | 290 | 0.000 | 2006 II | 412 | 0.000 | 2009 II | 238 | 0.006 | 2006 I  | 214 | 0.027 | 2005 II |
| 65 | 257 | 0.002 | 2010 II | 211 | 0.030 | 2007 I  | 203 | 0.023 | 2013 I  | 304 | 0.001 | 2010 II |
| 66 |     | 0.203 |         |     | 0.227 |         |     | 0.438 |         |     | 0.125 |         |
| 67 | 216 | 0.014 | 2013 I  |     | 0.185 |         | 317 | 0.000 | 2011 I  | 231 | 0.015 | 2012 II |
| 68 | 282 | 0.001 | 2012 I  | 328 | 0.000 | 2012 I  | 296 | 0.000 | 2012 I  |     | 0.116 |         |
| 69 | 289 | 0.000 | 2010 II | 360 | 0.000 | 2009 II | 336 | 0.000 | 2010 I  | 330 | 0.000 | 2010 I  |
| 70 | 151 | 0.017 | 2010 II |     | 0.067 |         | 238 | 0.000 | 2009 II | 158 | 0.025 | 2010 I  |
| 71 |     | 0.201 |         | 285 | 0.000 | 2012 I  | 236 | 0.000 | 2013 II |     | 0.055 |         |
| 72 | 330 | 0.000 | 2009 II | 212 | 0.029 | 2012 I  | 381 | 0.000 | 2010 I  | 314 | 0.000 | 2009 II |
| 73 |     | 0.261 |         |     | 0.146 |         |     | 0.201 |         |     | 0.434 |         |
| 74 |     | 0.184 |         | 357 | 0.000 | 2010 II |     | 0.128 |         |     | 0.125 |         |
| 75 |     | 0.213 |         | 376 | 0.000 | 2009 II | 233 | 0.003 | 2006 II |     | 0.057 |         |
| 76 |     | 0.171 |         | 369 | 0.000 | 2010 I  |     | 0.581 |         | 338 | 0.000 | 2009 II |
| 77 |     | 0.305 |         | 224 | 0.019 | 2014 I  |     | 0.423 |         |     | 0.490 |         |
| 78 |     | 0.213 |         | 406 | 0.000 | 2009 II |     | 0.262 |         | 221 | 0.021 | 2014 II |
| 79 |     | 0.524 |         | 316 | 0.000 | 2010 I  | 238 | 0.006 | 2006 II |     | 0.404 |         |
| 80 |     | 0.194 |         |     | 0.332 |         |     | 0.102 |         | 215 | 0.026 | 2008 II |
| 81 |     | 0.081 |         | 152 | 0.033 | 2010 I  | 189 | 0.002 | 2008 II | 170 | 0.014 | 2009 I  |
| 82 |     | 0.240 |         | 219 | 0.023 | 2011 II | 242 | 0.005 | 2004 I  |     | 0.296 |         |
| 83 |     | 0.102 |         | 257 | 0.005 | 2007 II | 268 | 0.001 | 2007 II |     | 0.169 |         |
| 84 |     | 0.188 |         | 282 | 0.000 | 2012 II |     | 0.108 |         |     | 0.227 |         |
| 85 | 223 | 0.011 | 2013 II | 249 | 0.007 | 2012 II | 285 | 0.001 | 2005 I  |     | 0.490 |         |
| 86 | 298 | 0.000 | 2008 II |     | 0.534 |         | 339 | 0.001 | 2008 I  | 206 | 0.035 | 2008 I  |
| 87 |     | 0.268 |         |     | 0.107 |         |     | 0.069 |         | 295 | 0.001 | 2008 I  |
| 88 | 258 | 0.002 | 2012 II |     | 0.135 |         | 207 | 0.020 | 2015 I  |     | 0.051 |         |
| 89 | 184 | 0.045 | 2010 II |     | 0.157 |         |     | 0.180 |         | 235 | 0.013 | 2010 II |
| 90 | 206 | 0.021 | 2004 I  | 305 | 0.001 | 2011 II | 183 | 0.047 | 2015 I  | 210 | 0.031 | 2016 II |
| 91 |     | 0.052 |         | 196 | 0.048 | 2006 II | 192 | 0.034 | 2014 II |     | 0.135 |         |

|     |     |               |  |  |                   |                   |                   |       |       |
|-----|-----|---------------|--|--|-------------------|-------------------|-------------------|-------|-------|
| 92  |     | 0.245         |  |  | 0.351             |                   | 0.124             |       | 0.446 |
| 93  |     | 0.469         |  |  | 222 0.020 2010 I  | 187 0.041 2008 II |                   | 0.173 |       |
| 94  |     | 0.108         |  |  | 321 0.000 2011 II | 192 0.034 2005 II |                   | 0.542 |       |
| 95  | 287 | 0.001 2012 I  |  |  | 0.161             | 349 0.000 2006 II | 281 0.002 2006 II |       |       |
| 96  | 282 | 0.001 2008 II |  |  | 208 0.033 2007 II | 328 0.000 2008 II | 322 0.000 2007 II |       |       |
| 97  |     | 0.189         |  |  | 301 0.001 2011 II | 217 0.013 2008 II | 252 0.007 2008 II |       |       |
| 98  |     | 0.653         |  |  | 238 0.000 2012 I  | 0.208             | 0.136             |       |       |
| 99  | 198 | 0.028 2005 II |  |  | 361 0.000 2010 II | 0.128             | 345 0.000 2006 I  |       |       |
| 100 |     | 0.256         |  |  | 371 0.000 2012 I  | 299 0.000 2006 II | 291 0.001 2006 II |       |       |
| 101 | 197 | 0.029 2005 II |  |  | 354 0.000 2008 II | 350 0.000 2011 II | 199 0.044 2016 II |       |       |
| 102 |     | 0.516         |  |  | 0.067             | 302 0.000 2007 II | 302 0.001 2007 II |       |       |
| 103 | 210 | 0.018 2011 I  |  |  | 0.086             | 192 0.034 2005 I  | 0.173             |       |       |
| 104 | 253 | 0.003 2012 I  |  |  | 334 0.000 2011 II | 280 0.001 2006 I  | 365 0.000 2006 I  |       |       |
| 105 | 265 | 0.002 2009 II |  |  | 324 0.000 2010 I  | 0.063             | 0.351             |       |       |
| 106 | 257 | 0.002 2009 II |  |  | 0.212             | 257 0.002 2009 I  | 197 0.046 2014 I  |       |       |
| 107 | 134 | 0.009 2015 II |  |  | 0.182             | 129 0.012 2015 II | 0.127             |       |       |
| 108 | 226 | 0.009 2009 II |  |  | 224 0.001 2008 II | 195 0.001 2010 I  | 159 0.024 2011 I  |       |       |
| 109 | 258 | 0.002 2013 I  |  |  | 0.185             | 355 0.000 2008 II | 0.302             |       |       |
| 110 |     |               |  |  | 392 0.000 2011 I  | 217 0.013 2009 I  | 267 0.004 2005 I  |       |       |
| 111 |     | 0.223         |  |  | 414 0.000 2010 I  | 0.154             | 208 0.033 2010 II |       |       |
| 112 | 214 | 0.015 2007 II |  |  | 343 0.000 2011 I  | 303 0.000 2009 II | 249 0.007 2009 I  |       |       |
| 113 | 244 | 0.004 2009 II |  |  | 420 0.000 2010 I  | 232 0.007 2010 I  | 298 0.001 2009 I  |       |       |
| 114 | 198 | 0.028 2009 I  |  |  | 253 0.006 204 II  | 389 0.000 2009 I  | 237 0.012 2008 II |       |       |
| 115 | 234 | 0.007 2009 I  |  |  | 349 0.000 2011 II | 0.096             | 0.058             |       |       |
| 116 | 339 | 0.000 2006 II |  |  | 250 0.007 2007 I  | 273 0.001 2006 I  | 338 0.000 2006 I  |       |       |
| 117 | 220 | 0.012 2011 II |  |  | 370 0.000 2012 I  | 308 0.000 2011 II | 249 0.007 2011 I  |       |       |
| 118 |     | 0.162         |  |  | 418 0.000 2010 II | 209 0.018 2009 I  | 262 0.004 2010 I  |       |       |
| 119 | 264 | 0.002 2007 I  |  |  | 399 0.000 2011 II | 0.139             | 410 0.000 2012 II |       |       |
| 120 |     | 0.655         |  |  | 314 0.000 2012 I  | 233 0.007 2008 I  | 204 0.037 2014 II |       |       |
| 121 | 196 | 0.030 2007 II |  |  | 342 0.000 2010 I  | 0.324             | 0.274             |       |       |
| 122 | 242 | 0.005 2009 II |  |  | 308 0.001 2011 II | 0.477             | 265 0.004 2006 I  |       |       |
| 123 |     | 0.111         |  |  | 432 0.000 2010 II | 0.331             | 203 0.038 2012 I  |       |       |
| 124 |     | 0.245         |  |  | 0.603             | 0.679             | 0.161             |       |       |
| 125 |     | 0.067         |  |  | 280 0.002 2011 II | 247 0.004 2013 I  | 0.285             |       |       |
| 126 |     | 0.344         |  |  | 282 0.002 2013 I  | 0.071             | 0.063             |       |       |
| 127 | 233 | 0.007 2012 I  |  |  | 264 0.004 2009 II | 348 0.000 2006 II | 207 0.034 2003 I  |       |       |
| 128 | 242 | 0.005 2004 II |  |  | 283 0.002 2012 II | 313 0.000 2011 II | 313 0.000 2006 I  |       |       |
| 129 |     | 0.655         |  |  | 388 0.000 2009 II | 212 0.016 2005 II | 0.094             |       |       |
| 130 |     | 0.118         |  |  | 368 0.000 2010 II | 0.121             | 334 0.000 2005 II |       |       |
| 131 | 198 | 0.028 2004 II |  |  | 351 0.000 2010 I  | 202 0.024 2014 I  | 0.247             |       |       |
| 132 |     | 0.251         |  |  | 344 0.000 2010 I  | 0.131             | 0.069             |       |       |
| 133 |     | 0.663         |  |  | 0.135             | 217 0.013 2006 II | 0.296             |       |       |
| 134 |     | 0.147         |  |  | 243 0.000 2011 II | 0.215             | 0.088             |       |       |
| 135 |     | 0.251         |  |  | 229 0.016 2008 II | 214 0.015 2013 I  | 0.102             |       |       |
| 136 | 216 | 0.014 2009 I  |  |  | 379 0.000 2010 I  | 352 0.000 2009 I  | 0.146             |       |       |
| 137 |     | 0.053         |  |  | 299 0.001 2013 I  | 322 0.000 2006 I  | 0.089             |       |       |
| 138 |     | 0.268         |  |  | 245 0.009 2012 I  | 191 0.036 2006 II | 0.165             |       |       |
| 139 |     | 0.102         |  |  | 324 0.000 2009 II | 200 0.026 2008 I  | 0.063             |       |       |
| 140 |     |               |  |  | 243 0.000 2009 II | 0.100             | 0.234             |       |       |

|     |     |       |         |     |       |         |     |       |         |       |       |         |
|-----|-----|-------|---------|-----|-------|---------|-----|-------|---------|-------|-------|---------|
| 141 |     | 0.084 |         | 161 | 0.021 | 2016 I  |     | 0.088 |         | 0.118 |       |         |
| 142 | 258 | 0.002 | 2014 II | 324 | 0.000 | 2011 II | 296 | 0.000 | 2010 I  | 362   | 0.000 | 2010 I  |
| 143 |     |       |         |     | 0.153 |         | 364 | 0.000 | 2009 II |       | 0.801 |         |
| 144 |     |       |         |     | 0.194 |         | 361 | 0.000 | 2010 I  |       | 0.580 |         |
| 145 | 184 | 0.045 | 2013 II | 251 | 0.007 | 2011 I  | 214 | 0.015 | 2007 I  | 275   | 0.003 | 2006 II |
| 146 | 252 | 0.002 | 2010 II | 291 | 0.001 | 2015 I  | 230 | 0.005 | 2010 II | 248   | 0.005 | 2009 I  |
| 147 |     | 0.485 |         | 211 | 0.030 | 2013 I  |     | 0.184 |         |       | 0.252 |         |
| 148 |     |       |         |     | 0.648 |         |     | 0.111 |         |       | 0.709 |         |
| 149 | 312 | 0.000 | 2006 I  | 346 | 0.000 | 2006 I  | 264 | 0.002 | 2006 I  |       | 0.161 |         |
| 150 | 280 | 0.001 | 2006 II |     | 0.588 |         |     | 0.057 |         | 249   | 0.007 | 2014 I  |
| 151 |     | 0.080 |         | 264 | 0.004 | 2011 II |     | 0.150 |         |       | 0.139 |         |
| 152 | 280 | 0.001 | 2011 II | 363 | 0.000 | 2012 II | 322 | 0.000 | 2008 II |       | 0.107 |         |
| 153 |     |       |         |     | 0.641 |         |     | 0.274 |         |       | 0.633 |         |
| 154 |     | 0.393 |         |     | 0.135 |         |     | 0.050 |         |       | 0.069 |         |
| 155 |     | 0.344 |         |     | 0.497 |         | 203 | 0.023 | 2009 I  |       | 0.107 |         |
| 156 | 150 | 0.018 | 2011 II | 242 | 0.000 | 2011 II | 231 | 0.000 | 2011 I  | 258   | 0.000 | 2011 II |
| 157 | 384 | 0.000 | 2009 II | 353 | 0.000 | 2012 II | 372 | 0.000 | 2008 II | 429   | 0.000 | 2008 II |
| 158 |     | 0.141 |         |     | 0.317 |         |     | 0.062 |         | 199   | 0.003 | 2010 I  |
| 159 | 345 | 0.000 | 2009 I  | 381 | 0.000 | 2010 I  | 213 | 0.016 | 2006 II |       | 0.833 |         |
| 160 |     | 0.080 |         | 372 | 0.000 | 2008 II |     | 0.118 |         | 389   | 0.000 | 2009 I  |
| 161 | 246 | 0.004 | 2008 I  | 418 | 0.000 | 2009 II |     | 0.194 |         | 335   | 0.000 | 2009 II |
| 162 |     | 0.078 |         | 286 | 0.002 | 2009 II |     | 0.324 |         | 207   | 0.026 | 2006 II |
| 163 | 224 | 0.010 | 2011 II |     | 0.089 |         | 285 | 0.001 | 2013 II | 391   | 0.000 | 2008 II |
| 164 | 169 | 0.006 | 2007 II | 218 | 0.001 | 2009 II |     | 0.108 |         |       | 0.444 |         |
| 165 |     | 0.091 |         | 370 | 0.000 | 2012 I  |     | 0.179 |         |       | 0.324 |         |
| 166 | 246 | 0.004 | 2011 II | 319 | 0.000 | 2013 II | 251 | 0.003 | 2012 II | 365   | 0.000 | 2013 II |
| 167 | 323 | 0.000 | 2007 II | 294 | 0.001 | 2012 I  |     | 0.099 |         | 301   | 0.001 | 2010 I  |
| 168 |     | 0.162 |         | 331 | 0.000 | 2009 II |     | 0.430 |         | 198   | 0.036 | 2011 I  |
| 169 |     | 0.541 |         | 326 | 0.000 | 2009 II |     | 0.565 |         | 418   | 0.000 | 2009 II |
| 170 |     | 0.126 |         | 201 | 0.003 | 2015 I  |     | 0.147 |         |       | 0.301 |         |
| 171 |     | 0.142 |         | 296 | 0.001 | 2010 II | 306 | 0.000 | 2012 I  | 246   | 0.008 | 2011 II |
| 172 | 220 | 0.000 | 2009 II | 288 | 0.000 | 2011 II |     | 0.100 |         | 165   | 0.018 | 2015 I  |
| 173 |     | 0.198 |         | 318 | 0.000 | 2009 I  |     | 0.063 |         | 219   | 0.023 | 2008 I  |
| 174 | 295 | 0.000 | 2012 I  | 284 | 0.002 | 2014 II | 275 | 0.001 | 2011 II | 224   | 0.019 | 2016 I  |
| 175 |     | 0.590 |         | 198 | 0.045 | 2009 II | 187 | 0.041 | 2009 II |       | 0.279 |         |
| 176 |     | 0.321 |         | 285 | 0.000 | 2012 I  | 137 | 0.036 | 2006 II | 205   | 0.002 | 2010 I  |
| 177 |     | 0.194 |         | 202 | 0.024 | 2006 II | 238 | 0.002 | 2010 I  | 393   | 0.000 | 2011 I  |
| 178 |     | 0.060 |         | 175 | 0.011 | 2012 I  |     | 0.287 |         |       | 0.114 |         |
| 179 | 332 | 0.000 | 2009 I  | 414 | 0.000 | 2009 I  | 254 | 0.003 | 2008 I  | 366   | 0.000 | 2010 I  |
| 180 | 245 | 0.004 | 2010 I  | 344 | 0.000 | 2012 I  | 314 | 0.000 | 2008 II |       | 0.058 |         |
| 181 |     | 0.175 |         | 301 | 0.000 | 2008 I  |     | 0.276 |         |       | 0.461 |         |
| 182 | 192 | 0.020 | 2009 II | 299 | 0.000 | 2009 II | 196 | 0.017 | 2005 II |       | 0.268 |         |
| 183 | 215 | 0.007 | 2015 I  | 390 | 0.000 | 2009 II | 349 | 0.000 | 2009 I  | 366   | 0.000 | 2010 I  |
| 184 | 220 | 0.006 | 2004 II | 372 | 0.000 | 2009 II |     | 0.068 |         |       | 0.324 |         |
| 185 | 240 | 0.002 | 2004 II | 262 | 0.002 | 2009 II | 191 | 0.021 | 2009 II |       | 0.052 |         |
| 186 |     | 0.080 |         | 418 | 0.000 | 2009 II | 325 | 0.000 | 2010 I  | 291   | 0.001 | 2011 II |
| 187 | 203 | 0.023 | 2012 II | 298 | 0.001 | 2006 II | 257 | 0.001 | 2012 I  |       | 0.093 |         |
| 188 | 329 | 0.000 | 2009 I  |     | 0.217 |         | 378 | 0.000 | 2009 I  |       | 0.679 |         |
| 189 | 347 | 0.000 | 2008 II |     | 0.099 |         | 318 | 0.000 | 2009 I  | 215   | 0.026 | 2009 I  |

|     |     |       |         |     |       |         |     |       |         |     |       |         |
|-----|-----|-------|---------|-----|-------|---------|-----|-------|---------|-----|-------|---------|
| 190 | 361 | 0.000 | 2010 I  | 231 | 0.015 | 2004 I  | 399 | 0.000 | 2010 I  | 272 | 0.003 | 2010 II |
| 191 |     | 0.129 |         | 316 | 0.000 | 2009 II |     | 0.129 |         |     | 0.086 |         |
| 192 | 132 | 0.045 | 2009 I  | 258 | 0.000 | 2009 II | 149 | 0.019 | 2009 I  | 161 | 0.021 | 2008 II |
| 193 | 297 | 0.000 | 2011 II | 327 | 0.000 | 2011 II | 319 | 0.000 | 2011 I  | 216 | 0.025 | 2016 II |
| 194 |     | 0.071 |         |     | 0.418 |         |     | 0.268 |         |     | 0.135 |         |
| 195 | 162 | 0.009 | 2009 II | 210 | 0.001 | 2015 II | 176 | 0.004 | 2015 II | 150 | 0.036 | 2015 II |
| 196 | 304 | 0.000 | 2011 II |     | 0.125 |         | 332 | 0.000 | 2011 II | 347 | 0.000 | 2009 II |
| 197 |     | 0.298 |         | 209 | 0.032 | 2005 I  |     | 0.150 |         | 351 | 0.000 | 2011 II |
| 198 | 186 | 0.002 | 2009 II | 203 | 0.002 | 2009 I  |     | 0.359 |         | 229 | 0.000 | 2009 II |
| 199 | 202 | 0.013 | 2010 II |     | 0.131 |         |     | 0.080 |         | 313 | 0.000 | 2009 II |
| 200 |     | 0.161 |         | 279 | 0.001 | 2009 I  |     | 0.290 |         | 242 | 0.007 | 2011 I  |
| 201 | 297 | 0.000 | 2010 II | 257 | 0.005 | 2009 II | 378 | 0.000 | 2010 I  | 324 | 0.000 | 2011 I  |
| 202 |     | 0.063 |         | 290 | 0.001 | 2009 I  | 372 | 0.000 | 2008 II |     | 0.461 |         |
| 203 |     | 0.084 |         | 216 | 0.001 | 2012 II | 142 | 0.028 | 2016 I  |     | 0.425 |         |
| 204 | 170 | 0.046 | 2011 I  | 340 | 0.000 | 2009 II | 248 | 0.001 | 2009 II |     | 0.639 |         |
| 205 | 374 | 0.000 | 2010 I  | 244 | 0.009 | 2005 II | 396 | 0.000 | 2010 II | 389 | 0.000 | 2011 I  |
| 206 | 344 | 0.000 | 2010 II | 210 | 0.031 | 2015 II | 361 | 0.000 | 2010 I  | 357 | 0.000 | 2012 I  |
| 207 | 235 | 0.006 | 2010 I  | 380 | 0.000 | 2013 I  | 285 | 0.001 | 2008 II | 200 | 0.042 | 2004 II |
| 208 | 299 | 0.000 | 2009 I  | 350 | 0.000 | 2013 I  | 324 | 0.000 | 2008 II | 198 | 0.045 | 2010 II |
| 209 | 312 | 0.000 | 2010 I  | 352 | 0.000 | 2009 II | 284 | 0.001 | 2008 II |     | 0.664 |         |
| 210 |     | 0.065 |         | 239 | 0.000 | 2012 I  | 144 | 0.025 | 2013 II | 252 | 0.000 | 2013 II |
| 211 |     | 0.135 |         | 358 | 0.000 | 2009 II | 302 | 0.000 | 2010 II | 240 | 0.005 | 2010 II |
| 212 |     | 0.203 |         |     | 0.129 |         |     | 0.175 |         | 211 | 0.030 | 2005 I  |
| 213 | 188 | 0.002 | 2009 I  | 252 | 0.000 | 2011 II |     | 0.081 |         | 255 | 0.000 | 2013 I  |
| 214 | 298 | 0.000 | 2008 II | 278 | 0.002 | 2009 II | 246 | 0.004 | 2010 II | 289 | 0.001 | 2010 II |
| 215 | 186 | 0.042 | 2004 II | 366 | 0.000 | 2011 II | 342 | 0.000 | 2007 II | 374 | 0.000 | 2011 I  |
| 216 |     | 0.365 |         | 234 | 0.013 | 2009 II |     | 0.135 |         | 306 | 0.001 | 2011 I  |
| 217 | 275 | 0.001 | 2011 II | 378 | 0.000 | 2010 I  | 344 | 0.000 | 2008 II | 201 | 0.041 | 2006 I  |
| 218 | 274 | 0.001 | 2006 I  | 332 | 0.000 | 2007 I  | 209 | 0.018 | 2004 II |     | 0.302 |         |
| 219 | 203 | 0.023 | 2005 I  | 307 | 0.001 | 2009 II | 218 | 0.013 | 2003 II | 291 | 0.001 | 2007 I  |
| 220 | 215 | 0.015 | 2006 II | 276 | 0.002 | 2014 II | 286 | 0.001 | 2006 II | 340 | 0.000 | 2014 I  |
| 221 | 209 | 0.018 | 2011 I  | 252 | 0.007 | 2011 II | 355 | 0.000 | 2011 I  |     | 0.059 |         |
| 222 | 382 | 0.000 | 2010 II | 168 | 0.107 | 2009 I  | 399 | 0.000 | 2010 I  | 272 | 0.003 | 2006 I  |
| 223 |     | 0.121 |         | 357 | 0.000 | 2009 II | 197 | 0.029 | 2015 I  | 292 | 0.001 | 2006 I  |
| 224 |     | 0.312 |         | 229 | 0.000 | 2014 I  | 155 | 0.014 | 2013 I  | 143 | 0.048 | 2015 II |
| 225 |     | 0.093 |         |     | 0.071 |         |     | 0.438 |         | 234 | 0.013 | 2014 I  |
| 226 |     | 0.622 |         | 284 | 0.002 | 2013 I  |     | 0.142 |         |     | 0.063 |         |
| 227 |     | 0.253 |         | 223 | 0.001 | 2009 I  | 152 | 0.017 | 2014 II | 150 | 0.036 | 2014 II |
